# Supplementary material for: Quantitative and Qualitative Stem Rust Resistance Factors in Barley Are Associated with Transcriptional Suppression of Defense Regulons
Source: PLoS Genet. 2011 Jul 28;7(7):e1002208. doi: 10.1371/journal.pgen.1002208 (PMC3145622; doi:10.1371/journal.pgen.1002208)
Supplement: Table S4 — Genes identified with eQTL in INOC and MOCK at the Rpg-TTKSK locus. (XLS) [file pgen.1002208.s011.xls]

## Sheet: Table S4
Table S4. Genes identified with eQTL in INOC and MOCK at the Rpg-TTKSK locus.
				INOC vs MOCK			Parameter estimates for 5H eQTL in MOCK								Parameter estimates for 5H eQTL in INOC
Barley1 Probe Set	Identifier	Species	Annotation	log(FC)	p-value		LOD	r2	a	Allele	Chr	Bin	cM		LOD	r2	AEE	Allele	Chr	Bin	cM
AF026538_at	Q9ZTW0	Hordeum vulgare	ABA-responsive protein	0.138286	0.00116603		6.83771	0.216696	-0.132242	SM	5	50	148.12		5.25633	0.236248	-0.116213	SM	5	50	148.12
Contig10630_at	Q94GE4	Oryza sativa	Dex1 protein	-0.0146587	0.680372		10.9191	0.350187	0.160248	Q	5	50	148.12		7.89607	0.282089	0.11972	Q	5	50	148.12
Contig11039_at	A0FHA7	H. vulgare	Multiple inositol polyphosphate phosphatase PhyIIa1	-0.0498413	0.224717		13.9849	0.456549	-0.200679	SM	5	48	145.43		18.9818	0.590096	-0.205408	SM	5	48	145.43
Contig11179_at	Q94GF1	O. sativa	Anthranilate synthase alpha 1 subunit	0.0944685	0.226471		35.5413	0.788673	-0.436703	SM	5	50	148.12		32.5334	0.849235	-0.477407	SM	5	50	148.12
Contig13447_s_at	Q0DM76	O. sativa	Unknown protein	-0.188756	3.41e-07		12.5018	0.42727	0.133985	Q	5	49	146.78		9.62718	0.43535	0.154789	Q	5	50	150.12
Contig14198_at	Os03g60790.1	O. sativa	protein heat shock protein DnaJ, N-terminal, putative, expressed	-0.105462	0.0719394		34.3628	0.781223	0.299222	Q	5	50	148.12		32.0977	0.760352	0.336828	Q	5	50	148.12
Contig17228_at	Q84NS9	O. sativa	Synbindin-like protein	-0.0702654	0.0102538		7.38814	0.243028	-0.0877914	SM	5	49	146.78		6.50579	0.285587	-0.0883008	SM	5	50	150.12
Contig18288_at	Q6ZC35	O. sativa	Hec1 protein	0.0201963	0.811707		24.3723	0.737788	-0.44336	SM	5	48	145.43		20.8352	0.66587	-0.4361	SM	5	50	150.12
Contig18288_s_at	Q6ZC35	O. sativa	Hec1 protein	-0.0061923	0.914504		18.821	0.577896	-0.291393	SM	5	49	146.78		18.943	0.587443	-0.249257	SM	5	49	146.78
Contig18431_at	Os01g40750.1	O. sativa	Unknown protein	-0.0470709	0.55134		6.05063	0.1074	0.159567	Q	5	50	148.12		3.16977	0.0776786	0.14838	Q	5	50	152.12
Contig21310_at	Q0E198	O. sativa	Unknown protein	0.0782966	0.101919		12.9296	0.527651	0.229215	Q	5	50	148.12		10.4544	0.412059	0.178906	Q	5	50	148.12
Contig22744_at	n.a.	n.a.	n.a.	0.32634	0.00269668		12.9788	0.506561	-0.540999	SM	5	46	143.41		20.5506	0.647258	-0.488788	SM	5	48	145.43
Contig23768_at	Q6ATM9	O. sativa	Unknown protein	0.0375266	0.669588		34.4102	0.788594	-0.536535	SM	5	50	148.12		31.1895	0.813359	-0.461661	SM	5	50	148.12
Contig24605_at	Os03g59550.1	O. sativa	RNA binding motif protein	-0.0045705	0.930184		11.633	0.400491	-0.302967	SM	5	46	141.41		4.05841	0.131475	-0.142306	SM	5	48	145.43
Contig26114_at	n.a.	n.a.	n.a.	-0.356511	0.00535138		4.55109	0.161527	-0.338814	SM	5	53	166.15		4.23126	0.166041	-0.349073	SM	5	48	145.43
Contig26116_at	Q6ZD83	O. sativa	Cytochrome P450 71C4	0.210954	0.0032549		6.28787	0.246225	-0.247913	SM	5	46	141.41		7.02021	0.282926	-0.20239	SM	5	50	150.12
Contig26172_at	Q10BA4	O. sativa	Protein kinase domain containing protein	0.147179	0.193253		5.66667	0.284086	-0.383533	SM	5	50	148.12		15.2894	0.482404	-0.478322	SM	5	50	148.12
Contig26580_at	n.a.	n.a.	n.a.	0.0142687	0.840694		20.9751	0.646852	0.446277	Q	5	48	145.43		30.317	0.689796	0.375195	Q	5	49	146.78
Contig320_at	Q9AVH2	Pisum sativum	Senescence-associated protein	-0.139114	0.049481		5.24563	0.213512	0.215079	Q	5	52	157.01		9.59581	0.376212	0.247917	Q	5	48	145.43
Contig3502_at	Q00531	H. vulgare	60 kDa jasmonate-induced protein	0.0628097	0.130634		14.6383	0.45528	0.214846	Q	5	49	146.78		10.9142	0.401896	0.173002	Q	5	49	146.78
Contig4389_at	Os11g44870.2	O. sativa	Unknown protein	0.294549	0.0923171		4.93553	0.248666	-0.598063	SM	5	49	146.78		13.0044	0.46588	-0.751771	SM	5	50	150.12
Contig4391_at	Os11g44870.2	O. sativa	Unknown protein	0.230782	0.359152		20.9202	0.563798	1.26785	Q	5	50	148.12		34.1027	0.860671	1.40897	Q	5	50	148.12
Contig4391_s_at	Os11g44870.2	O. sativa	Unknown protein	0.183616	0.0729004		7.20899	0.284526	0.374554	Q	5	47	144.08		10.3989	0.412722	0.403743	Q	5	50	148.12
Contig514_s_at	P22244	H. vulgare	Protein synthesis inhibitor I	-0.225302	0.000721663		7.83817	0.277653	-0.234554	SM	5	48	145.43		6.80412	0.226961	-0.182971	SM	5	48	145.43
Contig5672_at	Os10g17454.2	O. sativa	RNA binding motif protein	0.0184973	0.630145		3.88125	0.145773	-0.0815398	SM	5	53	166.15		4.52693	0.18477	-0.117833	SM	5	48	145.43
Contig6668_s_at	Q852A3	O. sativa	Unknown protein	-0.0113417	0.851901		36.2925	0.766068	0.348947	Q	5	49	146.78		31.707	0.723931	0.337619	Q	5	49	146.78
Contig699_s_at	Q852C1	O. sativa	Hypothetical protein	-0.0223645	0.64233		26.3237	0.712793	0.253923	Q	5	50	148.12		20.0691	0.471925	0.225263	Q	5	50	148.12
Contig7092_s_at	Q43655	Triticum aestivum	WCOR719 (Adf3)	0.772886	0.00676829		33.5149	0.800656	-1.51194	SM	5	49	146.78		47.4705	0.933689	-1.79984	SM	5	49	146.78
Contig7327_at	Os03g60380.1	O. sativa	Cinnamoyl CoA reductase	0.0412126	0.525208		31.8365	0.770678	0.361598	Q	5	48	145.43		29.7006	0.68984	0.328929	Q	5	48	145.43
Contig7641_at	Q84TW3	O. sativa	Transcription elongation factor	-0.15065	0.00262737		9.06935	0.326657	0.248996	Q	5	47	144.08		5.75288	0.259856	0.129333	Q	5	48	145.43
Contig8575_at	Q6Z4H7	O. sativa	Pentatricopeptide (PPR) repeat-containing protein	-0.348969	0.186846		28.1733	0.81684	1.50807	Q	5	49	146.78		32.6435	0.780851	1.48149	Q	5	49	146.78
Contig8701_at	Os03g61090.1	O. sativa	Unknown protein	-0.211508	2.25e-09		3.92745	0.136065	0.0723883	Q	5	50	148.12		3.37671	0.118666	0.0791974	Q	5	50	148.12
Contig9278_at	Q94D71	O. sativa	Pectinacetylesterase	0.063714	0.504713		7.06683	0.197465	0.289793	Q	5	50	148.12		11.6167	0.434946	0.401017	Q	5	50	148.12
Contig9278_s_at	Q94D71	O. sativa	Pectinacetylesterase	0.0436374	0.627633		7.36251	0.168369	0.300711	Q	5	50	150.12		17.7291	0.448977	0.365748	Q	5	50	148.12
Contig9839_at	Os03g60240.1	O. sativa	SCAR-like protein 1	-0.0780106	0.0107536		4.02196	0.160828	0.0918352	Q	5	47	144.08		3.94214	0.149846	0.0732966	Q	5	48	145.43
HC112E03_T3_s_at	Q9ZTW0	H. vulgare	ABA-responsive protein	0.0752425	0.382823		27.1182	0.641593	-0.546812	SM	5	50	148.12		40.9731	0.878664	-0.494517	SM	5	50	148.12
HV10D05u_x_at	Os07g36940.2	O. sativa	Actin-depolymerizing factor	-0.158931	0.0791052		16.6472	0.568492	-0.385422	SM	5	48	145.43		15.7841	0.619218	-0.478556	SM	5	49	146.78
HV14K24u_at	Q2L7E7	H. vulgare	Cluster: Rust resistance gene ABC1041; n=1; Hordeum vulgare subsp. vulgare|Rep: Rust resistance gene ABC1041 - Hordeum vulgare var. distichum (Two-rowed barley)	-0.0996178	0.00723356		16.0771	0.597137	-0.179427	SM	5	48	145.43		10.7663	0.415556	-0.150253	SM	5	50	150.12
HVSMEb0007M11r2_s_at	Os07g24190.1	O. sativa	Cellulose synthase A catalytic subunit 3	-0.0688024	0.027657		14.0598	0.416254	0.154647	Q	5	50	148.12		4.22759	0.125825	0.0607679	Q	5	49	146.78
HVSMEg0006G02r2_s_at	Q9FFX7	A. thaliana	Alpha-mannosidase	0.0571408	0.0986515		11.9269	0.391593	-0.149234	SM	5	50	148.12		13.3735	0.372523	-0.113904	SM	5	50	148.12
HVSMEm0005P18r2_at	Q84TA5	O. sativa	Hypothetical protein	-0.0473639	0.262528		14.7129	0.371466	-0.158313	SM	5	48	145.43		18.8301	0.622271	-0.21898	SM	5	48	145.43
HW06D02u_at	n.a.	n.a.	n.a.	-0.239963	0.0176292		8.80917	0.336259	-0.29672	SM	5	47	144.08		4.65766	0.174213	-0.310092	SM	5	50	148.12
HZ58F11r_at	P22244	H. vulgare	Protein synthesis inhibitor I	-0.135598	0.249162		18.2583	0.497748	0.529418	Q	5	48	145.43		18.6806	0.480875	0.509599	Q	5	48	145.43
rbags18k24_x_at	Q9M385	A. thaliana	50S ribosomal protein L17, chloroplast precursor	-0.352419	0.00112466		11.0683	0.313442	0.379126	Q	5	45	139.34		9.36649	0.320118	0.37883	Q	5	48	145.43
rbah27g12_at	UPI0000E48B78	Strongylocentrotus purpuratus	Hypothetical protein	-0.126028	0.359031		14.2995	0.480534	-0.576561	SM	5	48	145.43		17.8479	0.571205	-0.688656	SM	5	48	145.43
rbah27g12_s_at	UPI0000E48B78	S. purpuratus	Hypothetical protein	-0.249529	0.108696		19.4967	0.63919	-0.774694	SM	5	48	145.43		16.3018	0.519167	-0.700174	SM	5	48	145.43
