# Supplementary material for: Quantitative and Qualitative Stem Rust Resistance Factors in Barley Are Associated with Transcriptional Suppression of Defense Regulons
Source: PLoS Genet. 2011 Jul 28;7(7):e1002208. doi: 10.1371/journal.pgen.1002208 (PMC3145622; doi:10.1371/journal.pgen.1002208)
Supplement: Table S5 — Genes identified with an inoculation-specific eQTL at the 2H trans-eQTL hotspot. (XLS) [file pgen.1002208.s012.xls]

## Sheet: Table S5
Table S5. Genes identified with an inoculation-specific eQTL at the 2H.16 trans-eQTL hotspot.
				INOC vs MOCK			Parameter estimates for 2H eQTL in INOC
Barley1 Probe Set	UniProt Match	E-value		log(FC)	p-value		LOD	r2	AEE	Allele	Chromosome	Bin	cM
Contig10341_at	UniRef90_Q0DT38	0	Os03g0270700 protein (Fragment)	0.237417	4.02e-13		3.1285	0.116806	-0.0622822	SM	2H	16	44.19
Contig10437_at	UniRef90_Q10PM9	3e-89	Expressed protein (Os03g0228200 protein)	0.352568	2.78e-12		4.59044	0.167359	-0.126959	SM	2H	16	44.19
Contig10712_at	UniRef90_Q67VQ6	9e-59	Immunophilin-like (Os06g0484500 protein)	-0.0889824	0.012886		3.49226	0.13068	-0.0836596	SM	2H	16	44.19
Contig10822_at	UniRef90_A2XK88	3e-80	Putative uncharacterized protein	-0.437426	2.52e-08		8.39119	0.370252	-0.316338	SM	2H	16	44.19
Contig11056_at	UniRef90_A2WPC1	7e-73	Putative uncharacterized protein	-0.188432	3.82e-08		4.20769	0.136205	-0.0694405	SM	2H	16	44.19
Contig11232_at	UniRef90_Q01LE9	6e-49	H0622F05.5 protein	0.382464	0.000975749		3.61524	0.116412	0.235602	Q	2H	16	44.19
Contig11378_at				0.535491	2.81e-07		4.54163	0.161875	0.193796	Q	2H	16	44.19
Contig11836_at	UniRef90_A7DVT6	0	Alkaline invertase	0.180902	4.14e-06		5.13623	0.199203	0.107142	Q	2H	16	44.19
Contig1188_s_at	UniRef90_P07597	1e-62	Non-specific lipid-transfer protein 1	0.0910725	0.478781		4.93786	0.211197	0.357447	Q	2H	16	44.19
Contig11985_at	UniRef90_Q1KMT9	7e-64	Putative stress resistance-related protein	0.265721	0.00954097		3.4997	0.120953	-0.214682	SM	2H	16	44.19
Contig13204_at	UniRef90_Q53PZ1	8e-78	RING zinc finger protein, putative (Zinc finger, C3HC4 type family protein)	0.0608862	0.00590798		4.76548	0.202701	-0.0677273	SM	2H	16	44.19
Contig1328_s_at	UniRef90_P25069	5e-78	Calmodulin-2/3/5 n=190 Tax=Eukaryota RepID=CALM2_ARATH	0.117775	0.00299798		3.33043	0.124839	0.0899968	Q	2H	16	44.19
Contig13518_at	UniRef90_Q0DWF7	1e-155	Os02g0816900 protein (Fragment)	-0.0212273	0.503318		3.40793	0.149992	0.0661049	Q	2H	16	44.19
Contig13642_at	UniRef90_A2Y0P7	0	Putative uncharacterized protein	0.123741	3.97e-05		4.19555	0.171056	0.0837828	Q	2H	16	44.19
Contig14122_at	UniRef90_A2Y0B5	1e-143	Putative uncharacterized protein	-0.0441603	0.0703218		4.07285	0.166698	0.0647888	Q	2H	16	44.19
Contig14528_at				0.0347978	0.78936		4.63957	0.0686911	-0.218201	SM	2H	16	44.19
Contig14681_at	UniRef90_Q4VDM3	1e-117	Cyclic nucleotide-gated ion channel 1 (Fragment)	0.0370302	0.0600299		3.37569	0.143321	0.0457246	Q	2H	16	44.19
Contig14800_at	UniRef90_UPI000023CB87	2e-54	hypothetical protein FG04588.1 n=1 Tax=Gibberella zeae PH-1 RepID=UPI000023CB87	-0.0451287	0.0414659		4.2096	0.165197	0.0636729	Q	2H	16	44.19
Contig14966_at	UniRef90_Q2QQD3	0	Expressed protein (Os12g0498300 protein)	-0.170055	2.47e-08		4.14683	0.168307	0.0742943	Q	2H	16	44.19
Contig15068_at	UniRef90_Q8LH03	1e-125	Putative uncharacterized protein P0446F04.109	0.02695	0.206801		3.34591	0.152689	0.0845298	Q	2H	16	44.19
Contig15190_at	UniRef90_Q9ATQ9	7e-16	PST19	-0.102011	0.117196		3.63122	0.156692	0.21376	Q	2H	16	44.19
Contig15278_at				-0.076088	0.270859		3.27058	0.0601229	-0.0880335	SM	2H	16	44.19
Contig15576_at	UniRef90_Q5SMK6	3e-46	Putative DNA-binding protein phosphatase 2C (Os06g0179700 protein)	0.218641	6.81e-07		3.41753	0.124579	-0.0933946	SM	2H	16	44.19
Contig17401_at	UniRef90_Q2KNB9	3e-62	Hexokinase-2	-0.0222422	0.279182		3.94702	0.161403	0.0509164	Q	2H	16	44.19
Contig17678_at	UniRef90_Q10MH8	1e-177	DEAD-box ATP-dependent RNA helicase 24	-0.228656	1.08e-18		5.09625	0.203395	-0.0688522	SM	2H	16	44.19
Contig1826_s_at	UniRef90_A2WUT5	0	Putative uncharacterized protein	0.72314	6.79e-14		4.21903	0.049883	-0.11594	SM	2H	16	44.19
Contig20078_at	UniRef90_A2Z763	6e-74	Putative uncharacterized protein	0.0997568	0.442756		3.5012	0.137087	0.303007	Q	2H	16	44.19
Contig21535_at	UniRef90_A2Y0T1	9e-52	Putative uncharacterized protein	-0.120647	0.00247388		4.65035	0.204798	0.0973828	Q	2H	16	44.19
Contig21771_at	UniRef90_Q9VR49	5e-22	CG3047-PA n=1 Tax=Drosophila melanogaster RepID=Q9VR49_DROME	-0.0258773	0.824739		4.10664	0.0579119	0.175465	Q	2H	16	44.19
Contig2200_s_at	UniRef90_Q1G180	1e-134	MADS-box transcription factor TaAGL28	-0.248746	0.0181411		3.7475	0.157387	-0.271063	SM	2H	16	44.19
Contig2333_s_at	UniRef90_Q75L10	1e-105	Putative inorganic pyrophosphatase (Os05g0114000 protein)	0.388418	1.79e-17		5.78773	0.201776	0.0913533	Q	2H	16	44.19
Contig24229_at				0.0667633	0.518566		3.67365	0.163239	-0.25797	SM	2H	16	44.19
Contig26567_at	UniRef90_A5ART1	9e-17	Putative uncharacterized protein	-0.275247	3.5228e-05		3.49402	0.15755	0.257024	Q	2H	16	44.19
Contig2920_at	UniRef90_P23225	0	Ferredoxin-dependent glutamate synthase, chloroplastic	-0.182906	1.59e-10		3.24027	0.118535	-0.0631419	SM	2H	16	44.19
Contig3059_at	UniRef90_Q43492	0	Serpin-Z7	0.127503	0.162052		4.42573	0.187113	0.246988	Q	2H	16	44.19
Contig3181_at	UniRef90_Q0JCU7	0	Os04g0448900 protein	-0.0354087	0.199689		4.33356	0.190417	-0.0780917	SM	2H	16	44.19
Contig3504_at	UniRef90_Q8L8I5	1e-173	Jacalin-like protein LEM2	0.121978	0.324011		4.07272	0.17411	-0.399355	SM	2H	16	44.19
Contig3718_s_at	UniRef90_A2ZH95	0	Putative uncharacterized protein	0.0903244	0.000806112		3.52676	0.130342	-0.0557082	SM	2H	16	44.19
Contig4490_s_at	UniRef90_A3AYX8	2e-47	Putative uncharacterized protein	-0.426399	6.74e-07		3.52121	0.123403	-0.177314	SM	2H	16	44.19
Contig4690_at				0.0020189	0.973995		4.0541	0.156034	-0.131728	SM	2H	16	44.19
Contig4810_at				0.058722	0.701831		5.77035	0.241966	0.755838	Q	2H	16	44.19
Contig4891_at	UniRef90_Q2QWT6	0	2-oxoisovalerate dehydrogenase alpha subunit, mitochondrial, putative, expressed	0.020051	0.80526		3.3778	0.0274889	0.0883913	Q	2H	16	44.19
Contig5198_s_at	UniRef90_Q10RI6	4e-95	Expressed protein (Os03g0158300 protein)	-0.227408	0.000431303		3.31766	0.131619	-0.13356	SM	2H	16	44.19
Contig5665_at	UniRef90_Q10KT5	0	Cytochrome P450 family protein, expressed (Putative uncharacterized protein) (Os03g0370900 protein)	0.0093282	0.869095		4.34803	0.175157	0.139445	Q	2H	16	44.19
Contig6351_at	UniRef90_P93766	0	Protein MLO	-0.13161	0.00116678		4.94335	0.188578	0.118347	Q	2H	16	44.19
Contig6862_s_at	UniRef90_Q6Z6H2	6e-64	Methionine aminopeptidase	-0.148396	0.000418188		7.11318	0.288629	-0.118106	SM	2H	16	44.19
Contig7034_at	UniRef90_Q5VQ36	1e-121	Leaf senescence protein-like (Os06g0272900 protein)	0.0423237	0.477293		3.36262	0.110255	-0.122751	SM	2H	16	44.19
Contig7331_at	UniRef90_A2SXR9	1e-173	Uricase	0.0763335	0.134288		3.91642	0.146175	0.164916	Q	2H	16	44.19
Contig7473_at	UniRef90_Q0DDD3	1e-175	Os06g0232200 protein (Putative uncharacterized protein)	-0.178024	9.97e-08		3.49534	0.135357	-0.0709698	SM	2H	16	44.19
Contig7486_at	UniRef90_A2YGS8	3e-75	Putative uncharacterized protein	-0.0460919	0.520209		3.69222	0.104488	-0.127274	SM	2H	16	44.19
Contig7723_at	UniRef90_Q6EQ07	1e-106	Putative golgi SNAP receptor complex member 1 Golgi SNARE 28 kDa (Os09g0416700 protein)	-0.103233	2.05e-06		3.83586	0.160978	0.0475314	Q	2H	16	44.19
Contig8165_at	UniRef90_Q5Z9P7	1e-24	Calcium-dependent protein kinase CPK1 adapter protein 2-like (Os06g0715400 protein)	-0.054531	0.00860787		3.71089	0.155001	0.0524881	Q	2H	16	44.19
Contig8532_at	UniRef90_Q33B71	0	Hydrolase, alpha/beta fold family protein, putative, expressed	-0.0558466	0.0502163		3.81109	0.0784305	0.0730651	Q	2H	16	44.19
Contig8557_at	UniRef90_A2XZM2	2e-94	Putative uncharacterized protein	0.798207	3.71e-26		5.04023	0.207711	0.151784	Q	2H	16	44.19
Contig8835_at	UniRef90_A2Y2X6	4e-65	Putative uncharacterized protein	0.0248617	0.64069		3.62492	0.144556	0.119345	Q	2H	16	44.19
Contig9865_at				0.114825	0.000113311		3.43658	0.151066	0.063676	Q	2H	16	44.19
HT04E01r_at				0.333578	4.16e-07		5.24415	0.188534	-0.160689	SM	2H	16	44.19
HU05P03u_at				-0.126616	0.144723		3.96237	0.179808	-0.35607	SM	2H	16	44.19
HU08L02u_at				0.244132	0.142819		4.47058	0.196624	0.45925	Q	2H	16	44.19
HVSMEa0012D22r2_at				-0.107337	0.068155		3.89836	0.166345	0.247099	Q	2H	16	44.19
HVSMEc0001C18f2_at				0.163195	0.206997		3.79289	0.164469	-0.314515	SM	2H	16	44.19
HX08D14r_s_at	UniRef90_Q0D8W0	1e-154	Os07g0123700 protein	0.182535	2.3e-11		5.74358	0.201772	0.0646048	Q	2H	16	44.19
HY02C22u_x_at				-0.18702	3.8e-07		5.68492	0.205185	-0.0975866	SM	2H	16	44.19
rbaal25f02_at				-0.40095	5.7358e-05		3.15837	0.146473	0.279867	Q	2H	16	44.19
rbaal40l24_s_at	UniRef90_A2WN25	1e-106	Putative uncharacterized protein	-0.0739554	0.0384534		3.66868	0.157002	0.0952899	Q	2H	16	44.19
rbasd25b08_s_at	UniRef90_Q6VAG0	0	Tubulin alpha-2 chain n=18 Tax=Eukaryota RepID=TBA2_GOSHI	-0.130089	0.0200058		3.35856	0.151874	-0.130319	SM	2H	16	44.19
Contig10628_at	UniRef90_Q5QLG3	0	Phosphoribulokinase/uridine kinase-like (Os01g0682500 protein)	-0.210881	0.000393493		3.92476	0.180219	-0.160794	SM	2H	16	46.19
Contig12401_s_at	UniRef90_A2X9G0	1e-123	Putative uncharacterized protein	0.0063018	0.955717		3.3774	0.164855	-0.275322	SM	2H	16	46.19
Contig12732_at	UniRef90_Q2QX07	3e-90	Protein-tyrosine phosphatase containing protein, expressed (Putative uncharacterized protein) (Os12g0174800 protein)	0.125414	0.000243674		5.98232	0.236923	0.0894599	Q	2H	16	46.19
Contig14021_at	UniRef90_Q5N847	2e-86	Putative uncharacterized protein P0506A10.38-1 (Os01g0899500 protein)	-0.0701561	0.0915245		3.19797	0.117406	-0.0904812	SM	2H	16	46.19
Contig15336_at	UniRef90_Q9LLN5	1e-139	Receptor-like protein kinase	0.770386	8.13e-30		4.4247	0.205916	0.163696	Q	2H	16	46.19
Contig1814_at	UniRef90_Q69P91	1e-129	Putative chlorophyll a/b-binding protein type II (Os09g0439500 protein)	-0.357357	3.78e-09		3.84436	0.158299	-0.125591	SM	2H	16	46.19
Contig1849_at				-0.0130973	0.783173		3.81712	0.16788	-0.117129	SM	2H	16	46.19
Contig19008_at	UniRef90_B1PXB0	4e-21	MAP kinase phosphatase	-0.0317166	0.317696		3.51086	0.15037	0.0726876	Q	2H	16	46.19
Contig19393_at	UniRef90_Q651D5	1e-60	Probable aquaporin PIP2-7	-0.239598	0.0040803		3.85675	0.152239	-0.190689	SM	2H	16	46.19
Contig2748_at	UniRef90_A3B7A5	1e-138	Putative uncharacterized protein	-0.231542	7.8e-08		3.95434	0.188205	-0.148427	SM	2H	16	46.19
Contig2918_s_at	UniRef90_Q6B6L9	0	UDP-D-glucuronate decarboxylase (Fragment)	0.431833	4.62e-22		4.13338	0.17899	0.0780004	Q	2H	16	46.19
Contig4437_at	UniRef90_Q07300	9e-39	ATP synthase delta chain, chloroplastic n=2 Tax=Andropogoneae RepID=ATPD_SORBI	-0.22952	2.11e-05		3.66672	0.164691	-0.149199	SM	2H	16	46.19
Contig451_at	UniRef90_Q9ASP4	0	Dihydrolipoyl dehydrogenase	-0.230131	8.16e-05		4.09602	0.169185	-0.150908	SM	2H	16	46.19
Contig5436_s_at	UniRef90_Q0JQS5	0	Os01g0142100 protein	-0.245164	0.000289539		3.77862	0.166731	-0.178001	SM	2H	16	46.19
Contig6023_s_at	UniRef90_Q33AQ0	1e-165	Esterase/lipase/thioesterase family protein, putative, expressed (Os10g0169800 protein)	0.0350073	0.300514		4.03527	0.174339	0.0888523	Q	2H	16	46.19
Contig6600_at	UniRef90_Q7XN02	0	OSJNBb0038F03.9 protein (Os04g0544400 protein)	-0.322515	0.000104793		4.7896	0.138105	-0.170434	SM	2H	16	46.19
Contig6993_at				0.764648	1.29e-39		3.7497	0.167577	0.124408	Q	2H	16	46.19
Contig7183_at				-0.0007025	0.980867		4.15134	0.129771	0.0754587	Q	2H	16	46.19
Contig7664_at				0.0487106	0.0413639		3.31821	0.153792	0.0656611	Q	2H	16	46.19
Contig8900_at	UniRef90_Q0J0Q3	0	Os09g0502200 protein	0.0965516	0.00718138		3.89807	0.157524	0.0906514	Q	2H	16	46.19
EBro03_SQ007_M15_s_at	UniRef90_Q4U3Z6	0	Wall-associated kinase 3	0.516909	1.8e-11		5.73657	0.206861	0.26918	Q	2H	16	46.19
HM07I05r_at				0.0141699	0.749003		3.35077	0.168691	0.17576	Q	2H	16	46.19
HU05H13u_s_at	UniRef90_Q2I7K8	1e-126	Cryptochrome 2 (Fragment)	-0.126135	0.0652325		4.88254	0.144535	0.141987	Q	2H	16	46.19
HVSMEa0015G15r2_s_at	UniRef90_A4HRC0	1e-156	Putative NAC transcription factor	-0.702441	2.82e-13		3.31047	0.119219	0.248399	Q	2H	16	46.19
HVSMEf0002J15r2_s_at	UniRef90_A2WW49	0	Putative uncharacterized protein	-0.104558	0.00828068		3.29638	0.131615	-0.0926341	SM	2H	16	46.19
HVSMEk0004D22r2_s_at	UniRef90_Q8LIB3	0	Putative bZIP family transcription factor (Os07g0644100 protein)	0.0328937	0.226617		4.54962	0.176211	0.0676388	Q	2H	16	46.19
Contig10717_at	UniRef90_P12940	2e-21	Bowman-Birk type trypsin inhibitor	0.106896	0.367792		3.49753	0.0822048	0.236475	Q	2H	16	48.19
Contig10721_at	UniRef90_Q3V810	1e-178	Anthocyanin biosynthetic gene regulator PAC1	0.0758152	0.019097		3.62321	0.149441	0.100813	Q	2H	16	48.19
Contig12833_at	UniRef90_Q93VA3	4e-42	Cytochrome c6, chloroplastic	-0.444088	1.59e-08		4.49896	0.177959	-0.203858	SM	2H	16	48.19
Contig13118_at	UniRef90_A2YAP9	6e-64	Putative uncharacterized protein	0.361982	3.19e-10		3.09027	0.0598617	-0.0854444	SM	2H	16	48.19
Contig13206_at	UniRef90_Q84TX9	1e-107	Putative uncharacterized protein OSJNBa0094J08.25 (Os03g0816500 protein)	0.179676	0.000865239		5.82937	0.155191	0.126548	Q	2H	16	48.19
Contig13821_at				1.09365	2.73e-16		5.22595	0.218815	0.464889	Q	2H	16	48.19
Contig14075_at	UniRef90_Q94IN0	0	P-type ATPase (Fragment)	0.359056	1.17e-08		3.76022	0.0870309	0.114387	Q	2H	16	48.19
Contig15302_at	UniRef90_Q01JD4	1e-151	OSIGBa0130P02.5 protein	0.21422	7.92e-06		4.13398	0.153459	-0.104204	SM	2H	16	48.19
Contig16226_at	UniRef90_Q5ZDR1	0	RNA-binding protein-like (Os01g0329800 protein)	0.0005185	0.983932		3.42714	0.141584	0.0527748	Q	2H	16	48.19
Contig16816_at	UniRef90_Q01KK8	2e-14	OSIGBa0118P15.3 protein	-0.0928853	0.0820803		3.70805	0.184847	-0.173178	SM	2H	16	48.19
Contig17784_at	UniRef90_Q10NX4	5e-77	FAR1 family protein, expressed (Os03g0255400 protein)	-0.238842	1.5e-10		3.2871	0.150879	0.115023	Q	2H	16	48.19
Contig19066_at				0.462477	1.61e-16		5.16378	0.241443	0.200317	Q	2H	16	48.19
Contig19950_at	UniRef90_A2X3Z8	1e-35	Putative uncharacterized protein	0.087108	0.0275884		3.09984	0.141568	0.0890948	Q	2H	16	48.19
Contig20294_at				0.161481	2.93e-05		5.56623	0.202934	0.0898803	Q	2H	16	48.19
Contig21869_at	UniRef90_Q0IZI6	1e-16	Os09g0567800 protein	-0.0540746	0.62718		4.25428	0.0239494	-0.102831	SM	2H	16	48.19
Contig23066_at				-0.114483	0.246954		4.29922	0.218981	-0.387986	SM	2H	16	48.19
Contig25740_at	UniRef90_A2X2R8	6e-26	Putative uncharacterized protein	-0.0194806	0.810563		4.43606	0.209879	0.225936	Q	2H	16	48.19
Contig2580_3_s_at	UniRef90_A3AMW1	1e-75	Putative uncharacterized protein	-0.181963	5.69e-14		4.24515	0.207382	-0.0680865	SM	2H	16	48.19
Contig3079_at				0.0943075	0.000845057		5.65358	0.186414	0.067755	Q	2H	16	48.19
Contig3362_at				-0.550974	1.63e-14		4.26897	0.175248	0.198042	Q	2H	16	48.19
Contig3417_at	UniRef90_Q9LT08	1e-161	26S proteasome non-ATPase regulatory subunit 14 n=11 Tax=Embryophyta RepID=PSDE_ARATH	-0.0164451	0.501189		5.0718	0.244952	0.0762603	Q	2H	16	48.19
Contig4367_s_at	UniRef90_Q0JCX3	6e-51	Os04g0445200 protein	-0.114622	0.00406426		4.35349	0.194257	-0.10849	SM	2H	16	48.19
Contig4992_at	UniRef90_A9Z0U5	0	Aldehyde dehydrogenase n=1 Tax=Saccharum officinarum RepID=A9Z0U5_SACOF	-0.0569454	0.100774		4.12008	0.193834	0.152893	Q	2H	16	48.19
Contig5638_at	UniRef90_A9ZPJ6	0	Agmatine coumaroyltransferase	1.13145	4.25e-14		4.67105	0.170314	0.319389	Q	2H	16	48.19
Contig6028_s_at	UniRef90_Q0DIP0	8e-70	Os05g0373700 protein (Fragment)	0.0874233	0.018938		4.96866	0.195116	0.0914386	Q	2H	16	48.19
Contig6877_s_at	UniRef90_Q6YY65	1e-110	Putative uncharacterized protein OSJNBa0006O15.43-1 (Os02g0591600 protein)	-0.0983816	0.00242556		3.1086	0.125018	0.0793604	Q	2H	16	48.19
Contig7522_s_at	UniRef90_Q6ZDL1	3e-75	Oxygen evolving complex protein-like (Os08g0347500 protein)	-0.223564	5.28e-06		3.33848	0.146507	-0.105738	SM	2H	16	48.19
Contig8200_at	UniRef90_Q25A90	1e-124	B0812A04.8 protein	0.216498	4.46e-05		6.78876	0.189081	0.143821	Q	2H	16	48.19
Contig8225_at	UniRef90_Q84T61	0	Putative heat shock transcription factor (Os03g0854500 protein) (Heat shock factor protein HSF8, putative, expressed)	-0.0731162	0.0121247		3.78522	0.0923743	0.0537294	Q	2H	16	48.19
Contig9756_at	UniRef90_A2WP76	1e-177	Putative uncharacterized protein	-0.130301	4.7e-05		3.67228	0.155841	0.0861901	Q	2H	16	48.19
HB18P10r_at	UniRef90_B2CSI3	5e-24	Putative nucellin-like aspartic protease	-0.119558	0.29634		3.18252	0.141253	-0.359527	SM	2H	16	48.19
HW09I11u_s_at	UniRef90_A7J2I0	1e-158	Plasma membrane intrinsic protein	-0.121213	6.32e-08		4.45632	0.134467	-0.0478005	SM	2H	16	48.19
rbags12d05_x_at				-0.344291	0.131359		3.45487	0.156401	0.61341	Q	2H	16	48.19
baak24a02_s_at	UniRef90_Q53P96	6e-68	Fructose-bisphosphate aldolase	-0.0833694	0.765659		4.30909	0.0038263	-0.116593	SM	2H	17	49.61
Contig10413_at	UniRef90_Q69XX8	1e-146	Putative FKBP12 interacting protein	0.0010023	0.961768		3.7403	0.150044	0.0537627	Q	2H	17	49.61
Contig10777_at				-0.103753	0.00399145		5.25277	0.213948	-0.13162	SM	2H	17	49.61
Contig10860_at	UniRef90_Q10BU2	2e-89	Germin-like protein subfamily T member 1, putative, expressed (Os03g0804500 protein)	1.2706	1.92e-41		5.06971	0.201101	0.168664	Q	2H	17	49.61
Contig11063_at	UniRef90_Q9M423	0	Sucrose transporter 2	0.0608103	0.0917273		8.37218	0.30217	-0.113623	SM	2H	17	49.61
Contig11090_at	UniRef90_Q2QNV2	4e-71	Fiber protein Fb19, putative, expressed (Os12g0552500 protein)	0.148552	0.0178142		5.63022	0.147352	0.149135	Q	2H	17	49.61
Contig11103_at	UniRef90_Q69V56	4e-99	Putative copine I (Os06g0608800 protein)	0.106694	0.0335287		6.54037	0.239503	0.134997	Q	2H	17	49.61
Contig11191_at	UniRef90_A2Z370	1e-54	Putative uncharacterized protein	-0.0265207	0.623185		4.46008	0.0628882	0.123635	Q	2H	17	49.61
Contig11224_at	UniRef90_Q5W767	1e-161	Putative uncharacterized protein OJ1320_D10.7 (Os05g0353300 protein)	0.210472	9.03e-12		3.80941	0.148944	-0.0791188	SM	2H	17	49.61
Contig11318_at	UniRef90_Q69XM7	1e-112	Putative small GTP-binding protein Ran	0.0740788	0.0877545		6.63886	0.233123	-0.134704	SM	2H	17	49.61
Contig1143_at	UniRef90_P05621	1e-69	Histone H2B.2	-0.22659	0.0396099		3.31656	0.14373	-0.307293	SM	2H	17	49.61
Contig11433_s_at				0.0806103	0.0274372		3.85213	0.119747	0.0795085	Q	2H	17	49.61
Contig11436_at	UniRef90_Q6F2U8	1e-165	Putative DNA helicase (Os03g0586900 protein) (DNA helicase family protein, expressed)	0.0172969	0.614628		4.61266	0.153896	0.0923648	Q	2H	17	49.61
Contig11560_at				-0.0681628	0.0485461		3.32185	0.145991	0.0731336	Q	2H	17	49.61
Contig11955_at	UniRef90_Q6AT22	2e-34	Putative uncharacterized protein OSJNBa0029B02.7 (Os05g0176700 protein)	-0.12433	0.0978652		5.20987	0.18	0.201627	Q	2H	17	49.61
Contig12160_at	UniRef90_P93501	2e-46	Ubiquitin-like protein n=1 Tax=Phaseolus vulgaris RepID=P93501_PHAVU	-0.0121541	0.700914		5.9101	0.249887	0.112342	Q	2H	17	49.61
Contig12480_at	UniRef90_Q652I8	0	Putative uncharacterized protein OSJNBa0032M14.13 (Putative uncharacterized protein P0485A07.23)	-0.139561	0.0216392		3.42966	0.112463	-0.121229	SM	2H	17	49.61
Contig12484_at	UniRef90_A2XF84	3e-31	Putative uncharacterized protein	2.00535	6.26e-28		3.5573	0.154973	0.447399	Q	2H	17	49.61
Contig12629_s_at	UniRef90_Q5N7Q8	1e-148	Wall-associated kinase 4-like	0.892292	1.01e-24		4.72759	0.201363	0.164832	Q	2H	17	49.61
Contig12767_at	UniRef90_Q6YYY1	6e-56	Putative uncharacterized protein P0604E01.3 (Os08g0559900 protein) (Putative uncharacterized protein P0562A06.26)	-0.0187913	0.59221		4.77495	0.202244	-0.109748	SM	2H	17	49.61
Contig13144_at	UniRef90_Q2RAC2	0	Exocyst subunit EXO70 family protein, putative, expressed (Os11g0157400 protein)	0.236655	2.83e-06		4.88575	0.183468	0.116916	Q	2H	17	49.61
Contig13348_at	UniRef90_Q6K437	1e-109	Myosin heavy chain-like protein (Putative uncharacterized protein) (Os09g0133800 protein)	0.009716	0.873984		3.42292	0.141086	0.155206	Q	2H	17	49.61
Contig14004_at	UniRef90_Q0DZR6	1e-45	Os02g0602500 protein (Fragment)	-0.0784383	0.0401348		5.19971	0.212108	0.160877	Q	2H	17	49.61
Contig14052_at	UniRef90_O65816	0	Putative calmodulin binding transporter protein	0.25718	2.04e-14		4.02965	0.168614	0.0713066	Q	2H	17	49.61
Contig14162_s_at	UniRef90_A3BHB7	0	Putative uncharacterized protein	0.154252	0.000414866		3.82445	0.15381	0.10912	Q	2H	17	49.61
Contig15021_at	UniRef90_Q01JG6	0	H0818E04.17 protein	0.0397947	0.186905		3.84963	0.174107	0.0848863	Q	2H	17	49.61
Contig15099_s_at	UniRef90_P93181	9e-06	Pathogenesis-related protein	1.00007	1.36e-16		4.48492	0.103809	0.196538	Q	2H	17	49.61
Contig15201_at				0.0607464	0.608509		3.85677	0.151362	-0.302792	SM	2H	17	49.61
Contig15306_at	UniRef90_Q5ZDX5	1e-161	Ubiquitin-activating enzyme E1-like (Os01g0614900 protein)	-0.108853	0.0012465		3.85299	0.150214	0.0928536	Q	2H	17	49.61
Contig15642_at	UniRef90_A2ZRL7	0	DNA topoisomerase 2	-0.144501	0.0346917		3.75459	0.169269	-0.214388	SM	2H	17	49.61
Contig15762_at	UniRef90_Q0DEH4	1e-126	Os06g0152300 protein	0.0176351	0.699407		3.52572	0.13598	-0.0862711	SM	2H	17	49.61
Contig16109_at	UniRef90_A2XKG6	8e-36	Putative uncharacterized protein	0.147165	0.00715986		3.44307	0.163457	-0.147684	SM	2H	17	49.61
Contig17028_at	UniRef90_Q01MM0	1e-121	H1005F08.24 protein	0.139915	0.261448		4.38843	0.192239	-0.531597	SM	2H	17	49.61
Contig1846_s_at	UniRef90_Q43206	0	Catalase-1	-0.128086	5.83e-07		5.20478	0.219151	-0.0754326	SM	2H	17	49.61
Contig18587_at	UniRef90_Q0JCS8	2e-87	Os04g0451100 protein	0.0183515	0.588748		4.92284	0.178613	0.105615	Q	2H	17	49.61
Contig1871_at	UniRef90_A2ZAQ9	1e-146	Putative uncharacterized protein	-0.0868563	0.626943		3.35539	0.15308	-0.463389	SM	2H	17	49.61
Contig19862_at				-0.111918	0.0122354		4.71903	0.107655	-0.0950189	SM	2H	17	49.61
Contig19948_at	UniRef90_Q0D8W0	1e-154	Os07g0123700 protein	0.121855	2.2e-09		5.03527	0.197613	0.0521959	Q	2H	17	49.61
Contig20058_at	UniRef90_A2X923	2e-40	Putative uncharacterized protein	0.429482	3.33e-27		4.46278	0.18652	0.07862	Q	2H	17	49.61
Contig2155_at	UniRef90_Q5XUV3	1e-155	Chloroplast inositol phosphatase-like protein	-0.122193	7.51e-07		4.35732	0.179921	-0.0646056	SM	2H	17	49.61
Contig22053_at	UniRef90_B2WG33	1e-109	GTP-binding protein ryh1 n=2 Tax=Pleosporales RepID=B2WG33_9PLEO	-0.0146032	0.919994		3.39162	0.136203	-0.314228	SM	2H	17	49.61
Contig23311_at				0.0954235	0.25824		4.32659	0.15681	-0.174493	SM	2H	17	49.61
Contig23889_at	UniRef90_Q7XVK5	9e-45	OSJNBa0069D17.7 protein (Os04g0373400 protein)	0.177831	1.28e-06		4.26392	0.152372	0.116868	Q	2H	17	49.61
Contig24271_at	UniRef90_Q0IPH6	1e-138	Os12g0199800 protein	0.0438499	0.58115		3.14222	0.0711261	-0.133686	SM	2H	17	49.61
Contig24322_at	UniRef90_Q0DCS4	4e-53	Os06g0297400 protein	0.493558	4.04e-16		3.18844	0.130187	0.126142	Q	2H	17	49.61
Contig24409_at	UniRef90_A2YBJ3	0	Putative uncharacterized protein	0.441716	1.52e-15		4.93688	0.0876405	0.111236	Q	2H	17	49.61
Contig24995_at	UniRef90_Q3E8A3	1e-142	Uncharacterized protein At5g57035.1	0.235508	4.64e-12		3.30275	0.139911	0.0687107	Q	2H	17	49.61
Contig25238_at	UniRef90_Q9SXN1	4e-99	HOS66 protein (Homeobox protein HD1, putative, expressed)	0.025184	0.818851		3.4161	0.142692	-0.246905	SM	2H	17	49.61
Contig25503_at	UniRef90_Q67UK6	2e-25	NHL repeat-containing protein-like	-0.031218	0.182444		3.0199	0.112533	-0.0460636	SM	2H	17	49.61
Contig25864_at	UniRef90_Q67X53	2e-26	Putative beta-1,3-galactosyltransferase (Os06g0229200 protein)	0.500603	2.68e-21		4.59985	0.183895	0.114612	Q	2H	17	49.61
Contig26218_at	UniRef90_Q69QZ3	7e-78	Neurochondrin protein-like (Os02g0798700 protein)	0.133984	1.25e-05		6.21322	0.251471	0.0969266	Q	2H	17	49.61
Contig26527_at				0.263256	1.68e-09		3.30382	0.120452	0.0846414	Q	2H	17	49.61
Contig3308_at	UniRef90_Q9LRJ0	0	Glucose-6-phosphate 1-dehydrogenase	0.141432	0.00039405		5.23503	0.178428	0.0997539	Q	2H	17	49.61
Contig3360_at	UniRef90_A2WZE3	8e-43	Putative uncharacterized protein	-0.18633	1.85e-08		6.36844	0.204086	-0.111373	SM	2H	17	49.61
Contig3761_at	UniRef90_P93691	0	1,4-alpha-glucan branching enzyme II	-0.225447	9.93e-07		3.83596	0.128564	-0.106886	SM	2H	17	49.61
Contig3933_at	UniRef90_A2X070	1e-111	Putative uncharacterized protein	-0.0542542	0.00944996		4.1387	0.198965	0.0591991	Q	2H	17	49.61
Contig4290_at	UniRef90_Q8S2F4	0	Phosphate/phosphoenolpyruvate translocator protein-like (Putative uncharacterized protein)	0.613857	7.28e-32		3.50484	0.142692	0.0690209	Q	2H	17	49.61
Contig4296_at	UniRef90_Q9LST7	1e-106	Proteasome subunit beta type-3	0.0545922	0.0217727		6.60057	0.267199	0.0767008	Q	2H	17	49.61
Contig4324_s_at	UniRef90_Q9XEN6	1e-108	Chitinase IV	0.775966	3.53e-09		5.53313	0.182286	0.194881	Q	2H	17	49.61
Contig4344_at	UniRef90_Q70KT2	4e-92	TA8 protein (Fragment)	0.0391705	0.335594		3.79165	0.133829	0.0954088	Q	2H	17	49.61
Contig4409_at	UniRef90_Q6K1Q5	1e-104	Glycolipid transfer protein-like (Os02g0622400 protein)	0.0334035	0.0726255		3.46118	0.116875	0.0396467	Q	2H	17	49.61
Contig538_at	UniRef90_A7YA66	1e-134	PR17d	1.24456	1.94e-19		4.95229	0.21683	0.198707	Q	2H	17	49.61
Contig5429_s_at	UniRef90_A2Z222	2e-39	Putative uncharacterized protein	-0.0670263	0.000594413		4.72285	0.208585	-0.051672	SM	2H	17	49.61
Contig5531_at				0.369094	8.78e-25		4.10425	0.191093	0.0892763	Q	2H	17	49.61
Contig5887_at				0.607127	2.07e-13		4.04358	0.154727	0.168633	Q	2H	17	49.61
Contig6490_at				0.0740036	0.000765633		3.71644	0.182985	0.0657871	Q	2H	17	49.61
Contig6567_at	UniRef90_Q0DHB3	1e-88	Os05g0478200 protein (Putative uncharacterized protein)	0.165203	1.17e-07		4.18291	0.152334	0.0720482	Q	2H	17	49.61
Contig7379_at	UniRef90_Q53LS6	1e-158	At3g03330/T21P5_25 (Os11g0265400 protein) (Oxidoreductase, short chain dehydrogenase/reductase family protein, expressed)	-0.0818579	0.0431304		4.92067	0.0654784	0.06324	Q	2H	17	49.61
Contig7450_at	UniRef90_A2Z1K2	7e-40	Putative uncharacterized protein	0.284649	0.00235645		4.00386	0.124736	-0.198439	SM	2H	17	49.61
Contig7484_at	UniRef90_O24478	1e-166	B-keto acyl reductase (Beta-ketoacyl reductase)	0.0535712	0.0190087		4.94216	0.209971	0.0559803	Q	2H	17	49.61
Contig7500_at	UniRef90_Q94D47	0	Putative uncharacterized protein P0712E02.13 (Os01g0585100 protein) (Putative uncharacterized protein OSJNBb0024F06.26)	0.0575177	0.0210757		7.71171	0.315688	0.0938275	Q	2H	17	49.61
Contig7791_at	UniRef90_Q6AUC6	0	Putative uncharacterized protein OSJNBa0079H23.16	-0.0079204	0.691452		3.85387	0.145506	0.0419272	Q	2H	17	49.61
Contig7894_at				0.0441968	0.22		3.36946	0.148295	0.114226	Q	2H	17	49.61
Contig8004_at	UniRef90_Q9SQU2	2e-35	UPF0497 membrane protein At3g06390	0.571151	3.48e-07		3.26766	0.0570688	0.168579	Q	2H	17	49.61
Contig8045_at				-0.185593	3.23e-10		4.5705	0.135815	0.0692411	Q	2H	17	49.61
Contig8330_at	UniRef90_Q9ASK5	0	Putative acetoacetyl-coenzyme A thiolase (Os01g0110400 protein)	0.038573	0.291741		3.34661	0.102736	0.0721584	Q	2H	17	49.61
Contig8484_at	UniRef90_A2Z0X5	0	Putative uncharacterized protein	0.176072	0.000184039		4.94023	0.0754133	0.0798323	Q	2H	17	49.61
Contig8551_at	UniRef90_Q5MFV5	7e-92	BTH-induced protein phosphatase 2C 2 K2 form	0.49891	1.74e-19		3.68654	0.110817	0.0831797	Q	2H	17	49.61
Contig8563_at	UniRef90_Q10KB1	1e-125	Transthyretin family protein, expressed	-0.0445014	0.0779286		3.50821	0.13203	0.0581562	Q	2H	17	49.61
Contig8669_at	UniRef90_A3A7X6	2e-22	Putative uncharacterized protein	0.228267	0.0105079		3.75163	0.153449	0.180092	Q	2H	17	49.61
Contig8936_at	UniRef90_Q07661	1e-74	Nucleoside diphosphate kinase 1	0.0468194	0.190945		4.93456	0.168134	0.0953026	Q	2H	17	49.61
Contig8945_at	UniRef90_Q7XKR2	0	OSJNBa0053B21.9 protein	0.117238	0.000104189		4.62678	0.184374	0.0713121	Q	2H	17	49.61
Contig9028_at	UniRef90_Q9FQF8	1e-143	Protein kinase CK2 regulatory subunit CK2B1	-0.0925062	0.000713261		3.82359	0.145905	0.0647962	Q	2H	17	49.61
Contig9172_s_at	UniRef90_Q0GR06	1e-119	Germin-like protein 5a	0.394208	0.00225375		5.12176	0.232085	0.365577	Q	2H	17	49.61
Contig9704_at	UniRef90_Q0JCY4	1e-175	Os04g0443500 protein	0.040831	0.105484		3.55798	0.154722	0.0945721	Q	2H	17	49.61
EBpi07_SQ001_A11_at				0.417776	1.74e-13		3.61515	0.157964	0.135841	Q	2H	17	49.61
EBro04_SQ003_B10_s_at	UniRef90_A2WUG5	1e-125	Putative uncharacterized protein	0.390379	2.11e-10		7.82581	0.291734	0.155201	Q	2H	17	49.61
HA11O05u_at	UniRef90_Q0DWN3	6e-55	Os02g0805500 protein (Fragment)	0.396156	2.53e-09		3.27043	0.144614	0.155787	Q	2H	17	49.61
HA22H13r_at				0.0992702	0.604182		3.46347	0.145199	0.461817	Q	2H	17	49.61
HB20H10r_at				0.243296	1.78e-05		5.31981	0.128463	0.112548	Q	2H	17	49.61
HB31O02r_at				-0.095503	0.18949		3.73084	0.163392	-0.273744	SM	2H	17	49.61
HI05I11r_at				0.100658	0.198675		6.37641	0.227142	0.255969	Q	2H	17	49.61
HO13A14S_at				0.147393	0.207149		3.15008	0.139778	-0.260005	SM	2H	17	49.61
HO15C14S_s_at	UniRef90_Q7XML5	0	OSJNBa0040D17.13 protein	0.674698	5.62e-25		3.31488	0.158311	0.16903	Q	2H	17	49.61
HP01E21w_at				0.231603	0.0062908		5.82833	0.206834	0.223519	Q	2H	17	49.61
HR01O04u_at	UniRef90_Q5CD68	6e-36	Monoterpene glucosyltransferase	0.893366	9.71e-39		3.68578	0.143527	0.104701	Q	2H	17	49.61
HS06E04u_s_at	UniRef90_Q84VF5	1e-75	Possible protein kinase CK2 regulatory subunit (Fragment)	-0.0090978	0.690118		3.31987	0.114121	0.0554886	Q	2H	17	49.61
HS16J06u_at	UniRef90_Q6EP59	4e-80	Putative UDP-glycosyltransferase 85A8 (Os02g0578300 protein)	0.369788	1.24e-10		3.17813	0.129106	0.0894661	Q	2H	17	49.61
HS17B03u_at	UniRef90_Q0DDG5	2e-19	Os06g0225100 protein (Fragment)	-0.124028	0.0811386		4.07293	0.195686	-0.222246	SM	2H	17	49.61
HT05O08u_at				0.2551	0.0233956		7.4137	0.279693	0.284756	Q	2H	17	49.61
HV_CEa0004P03r2_at	UniRef90_Q6PT62	6e-47	Mlo3	0.73668	4.09e-09		3.25426	0.0987586	0.213576	Q	2H	17	49.61
HV_CEa0009K20r2_x_at				0.651915	1.08e-05		3.48413	0.104377	-0.31173	SM	2H	17	49.61
HV_CEb0015P21f_s_at	UniRef90_Q7F190	0	Malic enzyme	0.0343282	0.104712		5.55394	0.177093	0.0579095	Q	2H	17	49.61
HV_CEb0020C01r2_at	UniRef90_A2XDH9	2e-61	Putative uncharacterized protein	0.360395	4.55e-06		3.40534	0.119715	0.135054	Q	2H	17	49.61
HV08J24u_s_at	UniRef90_Q8H054	3e-75	Putative methionyl-tRNA synthetase (Putative uncharacterized protein)	-0.223541	2.34e-06		6.1503	0.217429	-0.125927	SM	2H	17	49.61
HVSMEa0020P01f_at	UniRef90_P03938	2e-21	Uncharacterized protein ycf68 n=4 Tax=Andropogoneae RepID=YCF68_MAIZE	0.156361	0.0240468		4.2531	0.158998	-0.190047	SM	2H	17	49.61
HVSMEg0007O05r2_at				0.183163	0.0244763		3.16283	0.136398	0.136907	Q	2H	17	49.61
HW06I17u_at	UniRef90_Q75L10	1e-106	Putative inorganic pyrophosphatase (Os05g0114000 protein)	0.457864	7.89e-07		4.04456	0.159772	0.237668	Q	2H	17	49.61
HZ48J16r_at				-0.0883948	0.549268		4.55249	0.178774	-0.401241	SM	2H	17	49.61
rbaal22m22_s_at	UniRef90_A2ZMQ9	1e-162	Putative uncharacterized protein	-0.112992	0.00294257		4.2551	0.185395	-0.111604	SM	2H	17	49.61
rbags16h12_s_at	UniRef90_Q8GTX7	0	Putative Squalene monooxygenase (Putative uncharacterized protein)	0.241402	5.44e-12		6.3363	0.217302	-0.0908889	SM	2H	17	49.61
rbags24p19_at	UniRef90_Q0J645	0.0001	Os08g0369500 protein	0.0459371	0.276152		5.98351	0.226574	0.132228	Q	2H	17	49.61
rbah28p12_s_at	UniRef90_Q01I02	1e-147	OSIGBa0132E09-OSIGBa0108L24.16 protein	0.047979	0.110254		6.78063	0.294529	0.149617	Q	2H	17	49.61
S0001000013A08F1_at	UniRef90_P84966	3e-10	Defensin Tk-AMP-D5	-0.13366	0.234969		3.43255	0.158031	0.29649	Q	2H	17	49.61
Contig1056_s_at	UniRef90_Q8H159	1e-166	Putative polyubiquitin (UBQ10)	-0.288795	7.97e-19		5.15111	0.239716	0.0958587	Q	2H	17	51.61
Contig10569_at	UniRef90_A2Y4B6	0	Cyclin-dependent kinase D-1	0.051365	0.0404518		3.30969	0.114333	0.0465028	Q	2H	17	51.61
Contig10775_at				0.0896022	0.00389128		5.54158	0.229818	0.0897865	Q	2H	17	51.61
Contig11313_at				0.187066	0.0381212		3.45787	0.100597	-0.181803	SM	2H	17	51.61
Contig11691_at				-0.0632425	0.0821494		3.88886	0.159508	0.0835076	Q	2H	17	51.61
Contig12332_at	UniRef90_Q6L5I9	3e-24	'putative inositol-1,4,5-trisphosphate phosphatase'	-0.308436	1.14e-06		5.61807	0.24387	0.215942	Q	2H	17	51.61
Contig12448_at	UniRef90_A2Y8G4	0	Putative uncharacterized protein	0.168563	0.000148772		5.26515	0.126849	0.0961368	Q	2H	17	51.61
Contig13189_at	UniRef90_A2Y095	3e-27	Putative uncharacterized protein	0.383497	2.26e-14		4.49232	0.230948	0.195128	Q	2H	17	51.61
Contig14296_at				0.759723	3.96e-19		4.43177	0.127452	0.157997	Q	2H	17	51.61
Contig14350_at				0.809198	1.82e-39		3.84511	0.178417	0.119865	Q	2H	17	51.61
Contig14701_at	UniRef90_Q2QXR0	8e-73	Expressed protein	0.0297021	0.82527		4.33871	0.225117	-0.422861	SM	2H	17	51.61
Contig15605_at	UniRef90_A2YNQ3	0	Putative uncharacterized protein	-0.34294	2.52e-24		5.84682	0.239267	0.0849355	Q	2H	17	51.61
Contig16603_at	UniRef90_Q0JJB5	1e-68	Os01g0749900 protein	0.283044	1.71e-23		6.54464	0.301453	0.101248	Q	2H	17	51.61
Contig1774_at	UniRef90_Q6YT73	0	Putative glycolate oxidase (Os07g0152900 protein) (Putative (S)-2-hydroxy-acid oxidase)	-0.205803	3.43e-11		3.41606	0.15918	-0.102343	SM	2H	17	51.61
Contig19871_at	UniRef90_Q5JK11	1e-162	Putative cell cycle dependent kinase C	0.634563	1.56e-22		5.23416	0.212011	0.143517	Q	2H	17	51.61
Contig20846_at	UniRef90_Q5SMM0	1e-172	LIM domain containing protein-like (Os06g0182500 protein)	0.274339	2.35e-11		6.97276	0.324794	0.166753	Q	2H	17	51.61
Contig22791_at	UniRef90_Q0E474	9e-14	Cyclin-T1-1	0.0233031	0.489647		3.60009	0.124895	0.0750526	Q	2H	17	51.61
Contig2488_s_at	UniRef90_A2Z9J7	1e-80	Putative uncharacterized protein	-0.125773	5.16e-07		4.45907	0.182308	-0.10639	SM	2H	17	51.61
Contig26165_at				-0.0522059	0.219796		4.66082	0.177775	0.117307	Q	2H	17	51.61
Contig2941_at	UniRef90_A2X7W0	1e-76	Putative uncharacterized protein	-0.435239	2.12e-08		4.04747	0.160714	-0.19045	SM	2H	17	51.61
Contig3759_s_at	UniRef90_Q10LF8	0	Nucleolar protein Nop56, putative, expressed (Putative uncharacterized protein) (Os03g0352300 protein)	-0.0292602	0.730216		3.10302	0.139948	-0.184615	SM	2H	17	51.61
Contig3919_at	UniRef90_Q69LA6	1e-160	Probable pyridoxal biosynthesis protein PDX1.1	-0.0654395	0.104592		9.26376	0.349088	-0.137627	SM	2H	17	51.61
Contig4291_at				0.477223	8.78e-21		5.60224	0.219287	0.115304	Q	2H	17	51.61
Contig4590_at	UniRef90_A2X1T8	3e-51	Putative uncharacterized protein	-0.250363	2.47e-09		3.43475	0.144906	-0.0882927	SM	2H	17	51.61
Contig477_at	UniRef90_A2X8J9	3e-23	Putative uncharacterized protein	0.474811	7.25e-08		7.52965	0.0828235	0.14598	Q	2H	17	51.61
Contig5537_at	UniRef90_Q9FRT5	0	Monosaccharide transporter 3	0.5028	3.4e-09		8.001	0.294834	0.190809	Q	2H	17	51.61
Contig5916_at	UniRef90_Q336S3	1e-144	Palmitoyl protein thioesterase containing protein, expressed	0.063785	0.0600371		4.53134	0.190282	0.0895933	Q	2H	17	51.61
Contig6229_s_at	UniRef90_Q9FUH4	0	Putative nematode-resistance protein (Hs1)	0.647978	1.73e-18		5.47977	0.20603	0.184928	Q	2H	17	51.61
Contig6301_s_at	UniRef90_Q2QNU9	1e-67	Leucine Rich Repeat family protein, expressed	0.114919	0.0583876		4.70775	0.166659	0.152784	Q	2H	17	51.61
Contig6879_at	UniRef90_A2X8Q2	1e-169	Putative uncharacterized protein	-0.0133306	0.753357		4.17847	0.181714	0.0920412	Q	2H	17	51.61
Contig7503_at	UniRef90_A2Y7A7	1e-170	Putative uncharacterized protein	0.107126	0.0165547		3.36949	0.134974	0.104115	Q	2H	17	51.61
Contig7522_at	UniRef90_Q6ZDL1	3e-75	Oxygen evolving complex protein-like (Os08g0347500 protein)	-0.177151	0.255514		4.21952	0.0154662	-0.122548	SM	2H	17	51.61
Contig7634_at	UniRef90_Q2QYE4	7e-71	Glutathione S-transferase, C-terminal domain containing protein, expressed (Os12g0123200 protein)	0.360127	1.61e-16		5.79715	0.236553	0.0945411	Q	2H	17	51.61
Contig7768_s_at	UniRef90_Q7XAF9	1e-177	Chloroplast SRP receptor cpFtsY	-0.299723	1.43e-16		3.42147	0.134816	-0.0672488	SM	2H	17	51.61
Contig9436_at	UniRef90_A3BWU4	2e-89	Putative uncharacterized protein	-0.309376	2.4e-05		4.94078	0.194728	-0.203028	SM	2H	17	51.61
Contig9763_s_at	UniRef90_Q0D605	8e-60	Os07g0520800 protein (Fragment)	-0.343345	2.8e-11		3.59862	0.157745	-0.121041	SM	2H	17	51.61
EBro08_SQ007_K09_at	UniRef90_Q6K447	1e-45	Putative NADPH-dependent retinol dehydrogenase/reductase (Os09g0133200 protein)	0.0098416	0.810418		5.07765	0.19716	0.109192	Q	2H	17	51.61
HD12A16r_at	UniRef90_Q6ZGZ0	2e-62	Putative purine permease	0.369284	1.47e-21		3.74327	0.202738	0.15486	Q	2H	17	51.61
HK03H05r_s_at	UniRef90_Q84TX9	1e-107	Putative uncharacterized protein OSJNBa0094J08.25 (Os03g0816500 protein)	0.121998	0.0178702		6.97325	0.196403	0.167141	Q	2H	17	51.61
HP01E21w_s_at	UniRef90_Q2QS74	3e-18	Expressed protein	0.155359	0.00163641		3.91602	0.164551	0.126044	Q	2H	17	51.61
HVSMEb0005E07r2_s_at	UniRef90_Q6Z8A4	1e-124	Putative zinc-binding protein (Putative uncharacterized protein) (Os02g0692700 protein)	0.180802	0.00142615		5.27868	0.216969	0.176991	Q	2H	17	51.61
HVSMEg0010P18r2_s_at	UniRef90_A2YXA3	3e-33	Putative uncharacterized protein	-0.144994	0.000149511		3.81645	0.147956	0.0925333	Q	2H	17	51.61
HVSMEl0013E16r2_s_at	UniRef90_Q6Z6F7	0	Putative xyloglucan fucosyltransferase (Os02g0763200 protein)	0.255273	1.97e-15		5.07776	0.219844	0.0716376	Q	2H	17	51.61
HY07J12u_at				-0.0509101	0.609362		4.09244	0.210433	-0.278489	SM	2H	17	51.61
S0001000056D22F1_at	UniRef90_Q40070	5e-20	Photosystem II 10 kDa polypeptide, chloroplastic	-0.308095	0.0330878		4.18627	0.15263	0.359208	Q	2H	17	51.61
Contig10324_at	UniRef90_Q10MD7	0	XPA-binding protein 1, putative, expressed (Os03g0312600 protein)	0.142395	0.000194655		3.57411	0.153294	0.100953	Q	2H	17	53.61
Contig10503_at	UniRef90_Q7XIR7	1e-145	Myosin-like protein (Os07g0508200 protein)	-0.0119428	0.479599		4.51302	0.177468	0.0515697	Q	2H	17	53.61
Contig1114_x_at	UniRef90_Q0J9W6	1e-167	Os04g0628100 protein n=2 Tax=Eukaryota RepID=Q0J9W6_ORYSJ	-0.253784	9.18e-12		4.03682	0.172348	0.0980785	Q	2H	17	53.61
Contig12053_at	UniRef90_A2WYG7	0	Putative uncharacterized protein	0.0791956	0.00422367		4.27356	0.180086	0.0696612	Q	2H	17	53.61
Contig12958_at	UniRef90_Q5QJA6	1e-146	Harpin binding protein 1	0.0725814	0.237195		5.15229	0.21894	-0.182662	SM	2H	17	53.61
Contig17435_at				0.147353	0.000209631		4.68609	0.16166	0.0924139	Q	2H	17	53.61
Contig18622_at				0.154731	3.33e-05		4.74135	0.170625	0.0904046	Q	2H	17	53.61
Contig2057_at	UniRef90_A1YKG8	6e-43	Early nodulin protein	0.0257525	0.891591		3.31192	0.108061	-0.404916	SM	2H	17	53.61
Contig23448_at	UniRef90_A2ZF48	1e-08	Putative uncharacterized protein	-0.0863972	0.101942		3.09541	0.150846	0.252903	Q	2H	17	53.61
Contig24094_at	UniRef90_Q0JCS0	2e-45	Os04g0452600 protein	0.483464	1.62e-18		6.02856	0.212058	0.119103	Q	2H	17	53.61
Contig25339_at	UniRef90_Q339M6	5e-48	Expressed protein (Os10g0343200 protein)	0.703823	2.37e-08		3.63271	0.0958577	0.265628	Q	2H	17	53.61
Contig2964_at	UniRef90_Q9SDL8	1e-178	Fructose-1,6-bisphosphatase, cytosolic	-0.162177	7.35e-06		3.72074	0.144162	-0.0874814	SM	2H	17	53.61
Contig3208_at	UniRef90_A7UHA3	2e-72	Blue copper-binding protein n=1 Tax=Dasypyrum villosum RepID=A7UHA3_9POAL	1.17551	2.64e-30		6.04307	0.244162	0.264018	Q	2H	17	53.61
Contig3271_s_at	UniRef90_Q6YZK5	1e-108	Putative uncharacterized protein P0488B06.35 (Os08g0359000 protein)	-0.320663	1.15e-08		3.80943	0.150336	-0.138508	SM	2H	17	53.61
Contig4052_at				-0.0480925	0.341864		3.28974	0.0478708	0.0732531	Q	2H	17	53.61
Contig4901_at	UniRef90_A2T582	3e-45	Rpr4901.2	0.0731774	0.289185		3.6514	0.0581518	0.106176	Q	2H	17	53.61
Contig5949_at				-0.0965596	0.59386		3.9027	0.184233	-0.862274	SM	2H	17	53.61
Contig8935_at	UniRef90_Q5N729	0	Putative uncharacterized protein P0491F11.32	0.592599	5.3e-31		5.23187	0.250483	0.122248	Q	2H	17	53.61
Contig909_s_at	UniRef90_Q01KC0	0	Aminomethyltransferase	-0.350466	4.06e-07		4.01727	0.166154	-0.186149	SM	2H	17	53.61
Contig9970_at	UniRef90_Q0DKP6	4e-92	Os05g0150100 protein	0.0837998	0.0176966		4.27664	0.169204	0.0912328	Q	2H	17	53.61
EBro03_SQ006_M03_at	UniRef90_A2Z703	3e-26	Putative uncharacterized protein	-0.27416	0.0368175		3.75524	0.174662	0.388662	Q	2H	17	53.61
HA28J12r_s_at	UniRef90_Q0E446	1e-119	Os02g0137200 protein (Fragment)	-0.454089	3.26e-08		4.22397	0.151415	-0.192318	SM	2H	17	53.61
HVSMEl0005L10f_s_at	UniRef90_Q69V56	4e-99	Putative copine I (Os06g0608800 protein)	0.222101	0.00292115		3.21634	0.117247	0.141665	Q	2H	17	53.61
Contig1019_at				-0.0216088	0.811478		3.48791	0.149898	-0.229561	SM	2H	18	55.04
Contig10295_at	UniRef90_Q2R820	0	Expressed protein	-0.242652	2.3e-09		3.31241	0.144043	-0.088965	SM	2H	18	55.04
Contig10306_s_at	UniRef90_Q5WMQ0	1e-46	Putative uncharacterized protein OSJNBa0053E01.2	-0.298916	0.000233399		3.5332	0.147258	-0.17642	SM	2H	18	55.04
Contig10492_at	UniRef90_Q337H1	1e-136	Prolyl 4-hydroxylase alpha subunit, putative, expressed (Os10g0497800 protein)	0.252586	8.19e-17		3.70265	0.136817	0.0680179	Q	2H	18	55.04
Contig10699_at	UniRef90_Q45KX6	0	Chloroplast Mg-chelatase subunit XANTHA-G	-0.4235	2.63e-07		3.32737	0.130746	-0.189052	SM	2H	18	55.04
Contig10883_at	UniRef90_Q2QYK3	0	Vacuolar sorting receptor 1, putative, expressed (Os12g0116000 protein)	-0.0724778	0.0343903		4.47711	0.182736	0.0888059	Q	2H	18	55.04
Contig11097_at	UniRef90_Q7F0N4	0	Alpha-rhamnosidase-like protein (Os07g0516000 protein)	0.172841	0.000284837		10.1963	0.355249	0.186719	Q	2H	18	55.04
Contig1192_s_at	UniRef90_Q40677	0	Fructose-bisphosphate aldolase, chloroplastic	-0.0488493	0.458551		4.30177	0.173852	-0.183708	SM	2H	18	55.04
Contig12232_at	UniRef90_Q01IZ2	2e-82	OSIGBa0102D10.1 protein (H0823A09.7 protein)	0.0001163	0.999257		4.74326	0.216981	-0.380412	SM	2H	18	55.04
Contig1225_s_at	UniRef90_A7J2I0	1e-158	Plasma membrane intrinsic protein	-0.145794	3.1766e-05		4.18642	0.152389	-0.0927688	SM	2H	18	55.04
Contig12250_at	UniRef90_Q652G7	1e-83	Putative DIP2 protein (Os06g0256200 protein)	0.0215164	0.394951		4.1681	0.15208	0.0566932	Q	2H	18	55.04
Contig12468_at	UniRef90_A1KXU8	6e-67	Fertilization independent endosperm	0.0045023	0.860473		3.97973	0.125503	0.0602741	Q	2H	18	55.04
Contig12560_at	UniRef90_Q7XIF5	0	Probable mannan synthase 7	0.223269	2.42e-06		4.70507	0.187872	0.123093	Q	2H	18	55.04
Contig13105_s_at	UniRef90_Q6C1W8	3e-08	Similarities with sp|P50111 Saccharomyces cerevisiae ZDS1 protein n=1 Tax=Yarrowia lipolytica RepID=Q6C1W8_YARLI	0.165631	8.87e-06		3.62938	0.13788	0.0760514	Q	2H	18	55.04
Contig13114_at	UniRef90_Q9FWK4	2e-06	Cyanate hydratase	0.718761	3.18e-08		3.93705	0.0959438	-0.252169	SM	2H	18	55.04
Contig13850_at				-0.0986301	0.252174		3.52253	0.0384034	0.182685	Q	2H	18	55.04
Contig13896_at				-0.287683	1.22e-10		4.93103	0.193919	0.108183	Q	2H	18	55.04
Contig15686_at	UniRef90_Q5NBJ1	0	Alpha-glucosidase-like	0.0458838	0.46137		2.98462	0.110668	0.135974	Q	2H	18	55.04
Contig15872_at	UniRef90_Q10PX0	3e-08	Expressed protein (Putative uncharacterized protein) (Os03g0218300 protein)	0.27313	3.4e-20		3.42273	0.152843	0.0864672	Q	2H	18	55.04
Contig16305_at	UniRef90_Q5Z811	4e-48	Putative transfactor (Os06g0703900 protein)	-0.172158	0.0196002		6.40356	0.242973	-0.205106	SM	2H	18	55.04
Contig16710_at				0.35405	1.68e-06		5.05136	0.168655	0.191786	Q	2H	18	55.04
Contig17805_at	UniRef90_Q10SV7	7e-98	Expressed protein (Os03g0109700 protein)	-0.0230707	0.506469		3.45887	0.146819	-0.0783997	SM	2H	18	55.04
Contig18407_at				-0.0431544	0.716961		4.50215	0.18346	-0.382617	SM	2H	18	55.04
Contig20101_at	UniRef90_A2X1I9	2e-48	Putative uncharacterized protein	-0.0489697	0.0807665		3.78557	0.155793	0.0693879	Q	2H	18	55.04
Contig20144_s_at				0.321252	1.63e-10		4.56925	0.140284	0.0954652	Q	2H	18	55.04
Contig20279_at	UniRef90_Q0DJ95	3e-60	Os05g0312500 protein	-0.0163069	0.861505		3.40828	0.141188	-0.265215	SM	2H	18	55.04
Contig2088_s_at	UniRef90_P12940	3e-74	Bowman-Birk type trypsin inhibitor	-0.0201584	0.919978		3.548	0.0207646	0.174381	Q	2H	18	55.04
Contig3300_at	UniRef90_A2Y4J7	1e-114	Putative uncharacterized protein	-0.0734178	0.0132526		3.78333	0.147175	-0.069336	SM	2H	18	55.04
Contig41_at	UniRef90_P59169	1e-69	Histone H3.3	0.157927	1.36e-05		5.49884	0.198794	0.105103	Q	2H	18	55.04
Contig41_x_at	UniRef90_P59169	1e-69	Histone H3.3	0.109758	0.00191167		4.38344	0.169398	0.0967748	Q	2H	18	55.04
Contig414_x_at	UniRef90_P40280	4e-68	Histone H2A	0.999978	1.1e-15		4.37058	0.208614	0.382653	Q	2H	18	55.04
Contig4374_s_at	UniRef90_A2YF60	1e-143	Putative uncharacterized protein	0.145703	0.00654205		3.20197	0.110467	0.114848	Q	2H	18	55.04
Contig442_at	UniRef90_Q84PA4	3e-87	H+-transporting ATP synthase chain 9-like protein (Os03g0278900 protein) (ATP synthase B chain, chloroplast, putative, expressed)	-0.282882	2e-10		3.58866	0.143524	-0.113	SM	2H	18	55.04
Contig4964_at	UniRef90_A2X7K2	1e-134	ATP-dependent Clp protease proteolytic subunit	-0.0622514	0.0145351		4.14294	0.186303	-0.116967	SM	2H	18	55.04
Contig5620_s_at	UniRef90_A2YI35	1e-180	Putative uncharacterized protein	-0.113099	0.00304262		3.55075	0.128993	-0.0885974	SM	2H	18	55.04
Contig6148_at	UniRef90_A2YGB0	2e-84	Putative uncharacterized protein	-0.183541	4.72e-05		3.28892	0.121705	-0.0937978	SM	2H	18	55.04
Contig6249_at	UniRef90_Q75I52	1e-178	Expressed protein (Seed maturation protein PM23, putative, expressed)	-0.122672	0.000328936		3.45816	0.0912257	-0.0673137	SM	2H	18	55.04
Contig6868_s_at	UniRef90_Q5JKR3	8e-62	Putative uncharacterized protein B1064G04.11 (Os01g0558800 protein) (Putative uncharacterized protein B1144D11.33)	-0.0720415	0.0043038		4.26132	0.177718	-0.0667838	SM	2H	18	55.04
Contig6918_s_at	UniRef90_A3BMB8	9e-43	Putative uncharacterized protein	-0.188391	6.44e-06		9.35621	0.341023	-0.143318	SM	2H	18	55.04
Contig7312_s_at	UniRef90_Q8L685	1e-20	Pherophorin-dz1 protein n=1 Tax=Volvox carteri f. nagariensis RepID=Q8L685_VOLCA	0.0274445	0.419596		3.71787	0.155726	0.0827074	Q	2H	18	55.04
Contig7505_at				0.0776724	0.00244169		3.22256	0.0855912	0.0460137	Q	2H	18	55.04
Contig7530_s_at	UniRef90_Q38JB3	1e-178	Chloroplast lipocalin	-0.298108	0.000168276		4.44639	0.114016	-0.161434	SM	2H	18	55.04
Contig7573_at				-0.212028	6.97e-11		3.6227	0.133916	-0.0735393	SM	2H	18	55.04
Contig7627_at	UniRef90_Q10SN1	1e-134	F-box family protein, putative, expressed (Os03g0116800 protein)	-0.0991943	0.000434991		3.44165	0.12174	0.0673716	Q	2H	18	55.04
Contig7834_at	UniRef90_O81989	0	Cp33Hv	-0.258427	0.00663443		3.16499	0.0411443	-0.151693	SM	2H	18	55.04
Contig7928_s_at	UniRef90_A2WWP0	5e-87	Putative uncharacterized protein	-0.133783	0.000328892		6.00818	0.111894	-0.122507	SM	2H	18	55.04
Contig86_at	UniRef90_P05167	0	Thiol protease aleurain	-0.083419	0.000105307		5.17134	0.193796	-0.083003	SM	2H	18	55.04
Contig8842_at				-0.016301	0.741524		3.58333	0.148788	0.120339	Q	2H	18	55.04
Contig8926_at	UniRef90_Q8GYJ9	2e-59	Putative uncharacterized protein At1g31160/F28K20_9 (Putative uncharacterized protein At1g31160)	-0.130784	0.0030636		3.43466	0.11794	-0.100697	SM	2H	18	55.04
Contig911_s_at	UniRef90_Q6YYJ6	1e-152	Putative uncharacterized protein OJ1590_E05.35-1 (Os08g0172200 protein)	-0.140808	1.54e-05		7.08141	0.255265	-0.0896098	SM	2H	18	55.04
EBem10_SQ004_D16_at				0.16559	0.00140752		6.61936	0.192316	0.165313	Q	2H	18	55.04
EBro02_SQ006_C03_at				0.0220598	0.728342		5.72197	0.0968933	0.128578	Q	2H	18	55.04
HA28D21r_at				-0.0544034	0.648173		4.60802	0.206589	0.523895	Q	2H	18	55.04
HK05M14r_at				-0.158192	0.354901		3.32498	0.148702	-0.427637	SM	2H	18	55.04
HT12J15u_at				0.0386482	0.840989		5.65363	0.245318	-0.834116	SM	2H	18	55.04
HVSMEb0020I08f_at	UniRef90_Q6ZD83	3e-30	Putative cytochrome P450 71C4 (Os08g0105800 protein)	-0.0007482	0.983454		4.65072	0.180308	0.0949704	Q	2H	18	55.04
HVSMEc0014L06f_s_at	UniRef90_Q8LLV5	3e-26	Nuclear matrix protein 1 (Fragment)	-0.0316481	0.283225		3.62105	0.136156	0.0669166	Q	2H	18	55.04
HVSMEg0006F05r2_s_at	UniRef90_Q6S3G1	1e-161	Extracellular calcium sensing receptor	-0.222267	2.33e-07		3.4885	0.140189	-0.109361	SM	2H	18	55.04
rbaal1o24_at	UniRef90_A2YG96	4e-42	Putative uncharacterized protein	-0.0840068	0.314603		3.84024	0.153952	0.238633	Q	2H	18	55.04
rbaal41j07_at	UniRef90_Q6ZFH7	5e-52	Putative sodium-dicarboxylate cotransporter (Os08g0503700 protein)	-0.0787341	0.217088		3.2711	0.0890417	-0.111214	SM	2H	18	55.04
rbasd21g03_s_at	UniRef90_Q6ZA50	7e-58	Putative DNA-directed RNA polymerase II 13.6K chain (Os07g0172500 protein)	0.0499965	0.0665027		3.47765	0.127838	0.0590656	Q	2H	18	55.04
