# Supplementary material for: Quantitative and Qualitative Stem Rust Resistance Factors in Barley Are Associated with Transcriptional Suppression of Defense Regulons
Source: PLoS Genet. 2011 Jul 28;7(7):e1002208. doi: 10.1371/journal.pgen.1002208 (PMC3145622; doi:10.1371/journal.pgen.1002208)
Supplement: Table S6 — Phenotypic data for seedling and adult QSM lines inoculated with Pgt race TTKSK. (XLS) [file pgen.1002208.s013.xls]

## Sheet: T1_seedling
Table 1. Seedling resistance QTL to Pgt-TTKSK identified using the QSM DH lines under controlled conditions.
Trait	Chra	Bin	cM	EWTb	LOD	a	Allelec	PVE
Infection Frequency for Infection Type 0	5	49	146.78	3.21988	23.4919	0.3335	Q21861	62.14
Infection Frequency for Infection Type 1	5	49	146.78	3.28463	18.4292	0.2342	Q21861	53.01
Infection Frequency for Infection Type 2	5	48	145.43	3.05163	4.47234	-0.1194	Q21861	19.56
Infection Frequency for Infection Type 3	5	49	146.78	3.30447	25.7532	-0.4609	Q21861	60.39
	7	7	11.18	3.30447	3.97738	0.0997	SM89010	4.33
Principal Component 1	5	49	146.78	3.39913	34.2901	0.6348	n.a.	66.03
Principal Component 2	none detected
Principal Component 3	1	35	125.14	3.00501	3.20023	-0.0926	n.a.	13.56
Principal Component 4	2	60	193.54	3.2697	5.50073	-0.0957	n.a.	24.8
aChromosome
bExperiment-wise threshold determined through CIM that included reselection of background markers for each of 1,000 permuted versions of the phenotype data
cAllele that confers greater resistance

## Sheet: T2_adult_2008
Table 2. Adult plant resistance QTL identified using the QSM DH lines grown in a 2008 field trial in Njoro, Kenya
Trait	Date	Chra	Bin	cM	EWTb	LOD	a	Allelec	PVE
Severity	2008-10-07	5H	46	141.41	3.26405	9.02607	-7.1696	Q21861	27.26
		7H	32	76.79	3.26405	6.0388	-5.7183	Q21861	15.7
	2008-10-17	1H	47	165.6	3.22489	4.38357	6.177	SM89010	10.24
		2H	16	44.19	3.22489	4.01614	5.8805	SM89010	9.28
		5H	27	74.91	3.22489	5.76528	-7.7161	Q21861	14.1
		5H	46	141.41	3.22489	7.13709	-7.9483	Q21861	17.56
	2008-11-10	2H	16	44.19	3.30192	3.9164	7.0867	SM89010	11.02
		5H	45	141.34	3.30192	5.26369	-8.341	Q21861	15.5
		6H	14	33.79	3.30192	3.68429	6.8031	SM89010	10.29
Lesion Size	2008-10-07	3H	53	178.16	3.13932	4.03127	-0.078	Q21861	11.2
		5H	46	141.41	3.13932	11.0422	-0.1381	Q21861	35.22
	2008-10-17	2H	16	44.19	3.15095	4.83711	0.0687	SM89010	11.34
		3H	53	182.16	3.15095	4.57351	-0.0663	Q21861	10.87
		5H	25	72.23	3.15095	6.89723	-0.0916	Q21861	10.87
		5H	50	148.12	3.15095	10.0247	-0.107	Q21861	27.96
	2008-11-10	5H	27	74.91	3.13399	6.20835	-0.058	Q21861	19.29
		5H	48	145.43	3.13399	4.06411	-0.0425	Q21861	11.77
		6H	4	6.7	3.13399	3.37712	0.0381	SM89010	9.57
Infection Coefficient	2008-10-07	5H	46	141.41	2.97522	10.2457	-8.1372	Q21861	30.91
		7H	32	76.79	2.97522	6.35512	-6.0987	Q21861	16.78
	2008-10-17	1H	44	154.82	3.16562	4.16397	6.7627	SM89010	10.85
		2H	16	44.19	3.16562	5.20634	7.3486	SM89010	13.32
		5H	48	145.43	3.16562	7.35476	-9.029	Q21861	19.91
	2008-11-10	1H	47	165.6	3.21073	4.33378	8.0361	SM89010	11.73
		2H	16	44.19	3.21073	3.62968	7.276	SM89010	9.61
		5H	27	74.91	3.21073	5.75445	-10.0933	Q21861	16.32
		5H	48	145.43	3.21073	4.32375	-7.8335	Q21861	11.54
aChromosome
bExperiment-wise threshold determined through CIM that included reselection of background markers for each of 1,000 permuted versions of the phenotype data
cAllele that confers greater resistance

## Sheet: ST7_phenotypic_data
Table S6. Phenotypic data for seedling and adult QSM lines inoculated with Pgt race TTKSK.
QSM line	Seedling Phenotypes										Adult Phenotypes
	Stakman Infection Type		Infection Frequency (IF)				Principal Component (PC)				Severity (SEV)			Lesion Size (LES)			Numeric Lesion Size (LES)			Infection Coefficient (IC)
	Rep 1	Rep 2	IF0	IF1	IF2	IF3	PC1	PC2	PC3	PC4	2008-10-07	2008-10-17	2008-11-10	2008-10-07	2008-10-17	2008-11-10	2008-10-07	2008-10-17	2008-11-10	2008-10-07	2008-10-17	2008-11-10
QSM001	3+	2	0	0	0.5	0.65	-0.56	-0.34	-0.04	-0.06	10	30	50	MR-MS	S	S	0.575	1	1	5.75	30	50
QSM002	0;1	00;	1.08	0.57	0	0	0.82	0.15	-0.09	0.08	2	2	10	MR-R	MR-R	MS-S	0.425	0.425	0.825	0.85	0.85	8.25
QSM003	0;	00;	1.08	0.25	0	0	0.69	0.15	-0.35	-0.06	20	30	50	S-MS	S-MS	S	0.925	0.925	1	18.5	27.75	50
QSM005	0;	0	0.85	0.15	0	0	0.52	0.07	-0.31	-0.21	15	30	30	MS	S	S	0.75	1	1	11.25	30	30
QSM008	0;	0;1-	0.8	0.53	0	0	0.64	0.06	0.03	-0.08	10	10	30	MR-MS	MS-S	S	0.575	0.825	1	5.75	8.25	30
QSM010	23-	3-0;	0.23	0.1	0.75	0.58	-0.36	-0.5	-0.13	0.18	5	15	20	MR	MS-S	S	0.5	0.825	1	2.5	12.375	20
QSM011	3+	0;23-	0.35	0.15	0.36	0.74	-0.33	-0.07	-0.08	0.16	10	20	20	MS-MR	MS-S	MS-S	0.675	0.825	0.825	6.75	16.5	16.5
QSM013	3+	3+	0	0	0	1.3	-0.94	0.37	0.07	0.07	40	50	70	S	S	S	1	1	1	40	50	70
QSM014	10;	0;1-	0.68	0.98	0	0	0.74	0.03	0.46	0.05	25	40	60	S-MS	S	S	0.925	1	1	23.125	40	60
QSM015	0;1-	0*0;	1.18	0.48	0	0	0.84	0.18	-0.22	0.08	3	10	30	MR	MR-MS	MS-S	0.5	0.575	0.825	1.5	5.75	24.75
QSM016	0;1-	0;1-	0.9	0.76	0	0	0.78	0.1	0.16	0.07	1	3	20	R-MR	R-MR	M	0.325	0.325	0.625	0.325	0.975	12.5
QSM017	3-	3-	0	0	0.3	0.7	-0.57	-0.15	0	-0.13	20	30	40	S	S	S	1	1	1	20	30	40
QSM018	1+	0;	0.35	0.5	0.15	0	0.34	-0.21	0.22	-0.23	5	10	30	MR-R	MS-MR	MS-S	0.425	0.675	0.825	2.125	6.75	24.75
QSM019	3	3-0;	0.23	0.1	0.15	0.85	-0.48	0.12	-0.02	0.03	20	30	50	S-MS	S-MS	MS-S	0.925	0.925	0.825	18.5	27.75	41.25
QSM023	2+	20;	0.23	0.1	0.85	0.15	-0.08	-0.78	-0.16	-0.02	30	40	50	S	S	S	1	1	1	30	40	50
QSM026	00;	00;	1.46	0.2	0	0	0.9	0.27	-0.6	0.1	3	5	20	MR-R	MR-MS	M	0.425	0.575	0.625	1.275	2.875	12.5
QSM028	3	00;	0.73	0.1	0	0.5	0.08	0.25	-0.27	0	50	60	60	S	S	S	1	1	1	50	60	60
QSM029	0;1	0*0;1	1.08	0.7	0	0	0.87	0.15	0.02	0.13	30	30	40	S	S	S	1	1	1	30	30	40
QSM030	3+	3-0	0.33	0	0.15	1	-0.56	0.21	-0.15	0.13	40	50	70	S	S	S	1	1	1	40	50	70
QSM031	3+	3	0	0	0	1.15	-0.84	0.3	0.06	-0.02	30	35	60	S	S	S	1	1	1	30	35	60
QSM033	0;1	0;	0.7	0.63	0	0	0.62	0.03	0.16	-0.08	10	20	30	MR-MS	S	S	0.575	1	1	5.75	20	30
QSM034	23-	3-0;	0.23	0.1	0.75	0.58	-0.36	-0.5	-0.13	0.18	20	40	40	MS-S	S	S	0.825	1	1	16.5	40	40
QSM035	3	20;1	0.23	0.22	0.5	0.5	-0.23	-0.33	0.01	0.06	5	10	30	MR-MS	MR-MS	MS-S	0.575	0.575	0.825	2.875	5.75	24.75
QSM036	3	0;3-	0.35	0.15	0.1	0.73	-0.29	0.15	-0.03	0.02	NA	10	20	NA	MS-S	S	NA	0.825	1	NA	8.25	20
QSM037	0;1-	0;	0.8	0.53	0	0	0.64	0.06	0.03	-0.08	10	15	30	MR-MS	MR-MS	S	0.575	0.575	1	5.75	8.625	30
QSM038	2+3-	3-	0	0	0.6	0.73	-0.62	-0.39	-0.06	0.04	30	40	40	S	S	S	1	1	1	30	40	40
QSM039	0;1-	0;	0.8	0.53	0	0	0.64	0.06	0.03	-0.08	3	10	20	MR	MR-MS	M	0.5	0.575	0.625	1.5	5.75	12.5
QSM041	0;1-	0;1	0.8	0.85	0	0	0.76	0.07	0.3	0.06	1	5	15	R-MR	R-MR	M	0.325	0.325	0.625	0.325	1.625	9.375
QSM042	0;1	0;	0.7	0.63	0	0	0.62	0.03	0.16	-0.08	20	25	40	MS-S	MS-S	S	0.825	0.825	1	16.5	20.625	40
QSM043	3	3-0;	0.23	0.1	0.15	0.85	-0.48	0.12	-0.02	0.03	20	40	40	S-MS	S	S	0.925	1	1	18.5	40	40
QSM045	3+	0;	0.35	0.15	0	0.65	-0.23	0.19	-0.02	-0.08	10	20	30	MR-MS	MS-S	S	0.575	0.825	1	5.75	16.5	30
QSM046	0;11+	0;1	0.7	1.04	0.04	0	0.77	0.01	0.49	0.11	15	15	40	MR-MS-S	MR-MS-S	MS-S	0.525	0.525	0.825	7.875	7.875	33
QSM047	33+	3	0	0	0	1.42	-1.02	0.42	0.07	0.14	40	60	80	S	S	S	1	1	1	40	60	80
QSM048	3	3+	0	0	0	1.15	-0.84	0.3	0.06	-0.02	30	80	80	S	S	S	1	1	1	30	80	80
QSM049	0;1-	00;	1.18	0.48	0	0	0.84	0.18	-0.22	0.08	10	10	20	MR-MS	MR-MS-S	MR-MS	0.575	0.525	0.575	5.75	5.25	11.5
QSM050	0;1	0;	0.7	0.63	0	0	0.62	0.03	0.16	-0.08	5	15	30	MR-MS	MS-MR	MS-S	0.575	0.675	0.825	2.875	10.125	24.75
QSM052	0;	0;1-	0.8	0.53	0	0	0.64	0.06	0.03	-0.08	0	10	20	S	MSS	MS-S	1	0.825	0.825	0	8.25	16.5
QSM054	00;	0;	1.08	0.25	0	0	0.69	0.15	-0.35	-0.06	20	50	70	S-MS	S	S	0.925	1	1	18.5	50	70
QSM055	3-	30;	0.23	0.1	0.15	0.85	-0.48	0.12	-0.02	0.03	15	30	30	S-MS	S	S	0.925	1	1	13.875	30	30
QSM056	0;11+	0;	0.7	0.71	0.04	0	0.65	0	0.23	-0.03	15	40	60	MR-MS	MS	S	0.575	0.75	1	8.625	30	60
QSM057	10;	0;1	0.58	1.07	0	0	0.72	0	0.6	0.05	25	30	40	S	S	MS-S	1	1	0.825	25	30	33
QSM058	3	3+	0	0	0	1.15	-0.84	0.3	0.06	-0.02	40	60	80	S	S	S	1	1	1	40	60	80
QSM059	3	2-0;	0.23	0.25	0.35	0.5	-0.2	-0.2	0.06	0	30	30	60	S	S	S	1	1	1	30	30	60
QSM060	3-	3-	0	0	0.3	0.7	-0.57	-0.15	0	-0.13	60	60	80	S	S	S	1	1	1	60	60	80
QSM061	3-	3+	0	0	0.15	1	-0.75	0.11	0.03	-0.03	20	40	60	S	S	S	1	1	1	20	40	60
QSM062	3-0;1	3+	0.23	0.22	0.15	1	-0.53	0.19	0.09	0.17	60	60	80	S	S	S	1	1	1	60	60	80
QSM063	3	2+0;	0.23	0.1	0.35	0.65	-0.36	-0.14	-0.06	0.02	30	50	70	S	S	S	1	1	1	30	50	70
QSM065	3+	3+	0	0	0	1.3	-0.94	0.37	0.07	0.07	30	60	70	S-MS	S	S	0.925	1	1	27.75	60	70
QSM066	23-	0;	0.35	0.15	0.6	0.23	-0.01	-0.49	-0.14	-0.02	20	30	60	MS-MR-S	MS-S	S	0.475	0.825	1	9.5	24.75	60
QSM067	210;	0;1	0.44	0.84	0.5	0	0.48	-0.47	0.39	0.13	20	40	60	S	S	S	1	1	1	20	40	60
QSM068	3	3	0	0	0	1	-0.74	0.23	0.06	-0.11	30	40	60	S	S	S	1	1	1	30	40	60
QSM069	3	3	0	0	0	1	-0.74	0.23	0.06	-0.11	30	50	60	S	S	S	1	1	1	30	50	60
QSM070	0;	0;	0.7	0.3	0	0	0.49	0.02	-0.1	-0.22	20	30	60	MR-MS	MR-MS	S	0.575	0.575	1	11.5	17.25	60
QSM073	3	3	0	0	0	1	-0.74	0.23	0.06	-0.11	30	60	80	S	S	S	1	1	1	30	60	80
QSM074	3+	3	0	0	0	1.15	-0.84	0.3	0.06	-0.02	30	50	80	S	S	S	1	1	1	30	50	80
QSM075	0;12-	0;12-	0.7	1.03	0.18	0	0.75	-0.11	0.46	0.17	40	60	80	S	S	S	1	1	1	40	60	80
QSM076	3	0;2	0.35	0.15	0.33	0.5	-0.16	-0.14	-0.08	0	30	50	80	S-MS	S	S	0.925	1	1	27.75	50	80
QSM077	2+3-	2+	0	0	0.8	0.53	-0.51	-0.64	-0.1	0.02	40	60	80	S	S	S	1	1	1	40	60	80
QSM078	0;2	0;3	0.7	0.3	0.33	0.33	0.23	-0.1	-0.15	0.13	5	10	30	MR-MS	MR-MS	MS-S	0.575	0.575	0.825	2.875	5.75	24.75
QSM079	3	3+20;	0.09	0.04	0.33	1.15	-0.81	0.06	-0.01	0.2	15	40	60	MS-S	MS-S	S	0.825	0.825	1	12.375	33	60
QSM080	00;	00;	1.46	0.2	0	0	0.9	0.27	-0.6	0.1	15	30	40	MR-MS	MS-S	S	0.575	0.825	1	8.625	24.75	40
QSM082	2+	20;	0.23	0.1	0.85	0.15	-0.08	-0.78	-0.16	-0.02	30	60	70	S	S	S	1	1	1	30	60	70
QSM083	3-	3+	0	0	0.15	1	-0.75	0.11	0.03	-0.03	20	30	60	S	S	S	1	1	1	20	30	60
QSM084	3-	3	0	0	0.15	0.85	-0.65	0.04	0.03	-0.12	20	30	60	S	S	MS-S	1	1	0.825	20	30	49.5
QSM085	3-	3	0	0	0.15	0.85	-0.65	0.04	0.03	-0.12	15	30	50	S-MS	S	MS-S	0.925	1	0.825	13.875	30	41.25
QSM086	0;	0;	0.7	0.3	0	0	0.49	0.02	-0.1	-0.22	20	20	40	S-MS	S	S	0.925	1	1	18.5	20	40
QSM087	0;1	0;1	0.7	0.95	0	0	0.74	0.04	0.43	0.05	1	5	20	MR-R	MR-MS	M	0.425	0.575	0.625	0.425	2.875	12.5
QSM088	3-	2+	0	0	0.5	0.5	-0.45	-0.41	-0.04	-0.14	10	30	40	MS-MR	S	S	0.675	1	1	6.75	30	40
QSM089	0;	0;1-	0.8	0.53	0	0	0.64	0.06	0.03	-0.08	5	30	40	MR-MS	MS-S	S	0.575	0.825	1	2.875	24.75	40
QSM090	23-	2	0	0	1.1	0.23	-0.34	-1.03	-0.16	0	15	20	30	S-MS	MS-S	S	0.925	0.825	1	13.875	16.5	30
QSM091	3	30;	0.23	0.1	0	1	-0.56	0.31	0.01	0.04	25	30	30	S	S	S	1	1	1	25	30	30
QSM093	00;	00;	1.46	0.2	0	0	0.9	0.27	-0.6	0.1	1	1	10	R	R	M	0.25	0.25	0.625	0.25	0.25	6.25
QSM094	3+	3	0	0	0	1.15	-0.84	0.3	0.06	-0.02	15	30	30	S	S	S	1	1	1	15	30	30
QSM095	0;1-	0;	0.8	0.53	0	0	0.64	0.06	0.03	-0.08	NA	NA	NA	NA	NA	-	NA	NA	NA	NA	NA	NA
QSM097	0;1	0;	0.7	0.63	0	0	0.62	0.03	0.16	-0.08	10	10	20	S-MS	S-MS	S	0.925	0.925	1	9.25	9.25	20
